# Supplementary material for: High-throughput kinome-RNAi screen identifies protein kinase R activator (PACT) as a novel genetic modifier of CUG foci integrity in myotonic dystrophy type 1 (DM1)
Source: PubMed Central journal article supplement (PMC8439471; doi:10.1371/journal.pone.0256276), 2021-09-14

# Figure 3, Supplementary Figure 6A-B

## Trial 1:

anti-PACT (film, chemiluminescence)

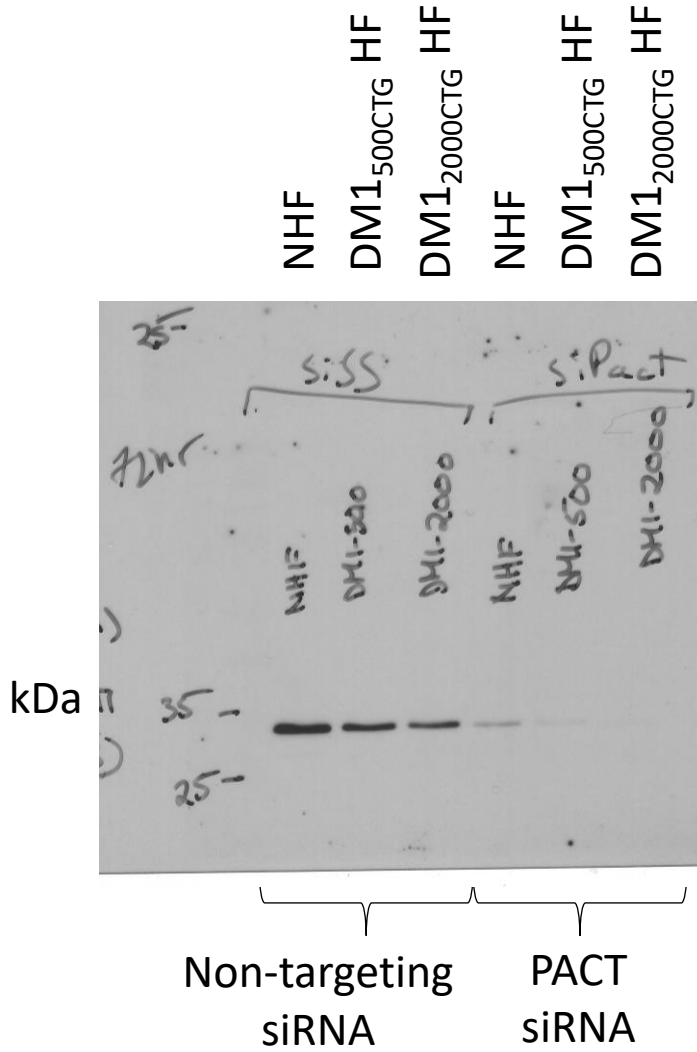

### Figure 3, Supplementary Figure 6A-B

#### Trial 1:

anti-MBNL1 (film, chemiluminescence)

(exposure A used for quantification; exposure B used to show markings for the ladder size reference)

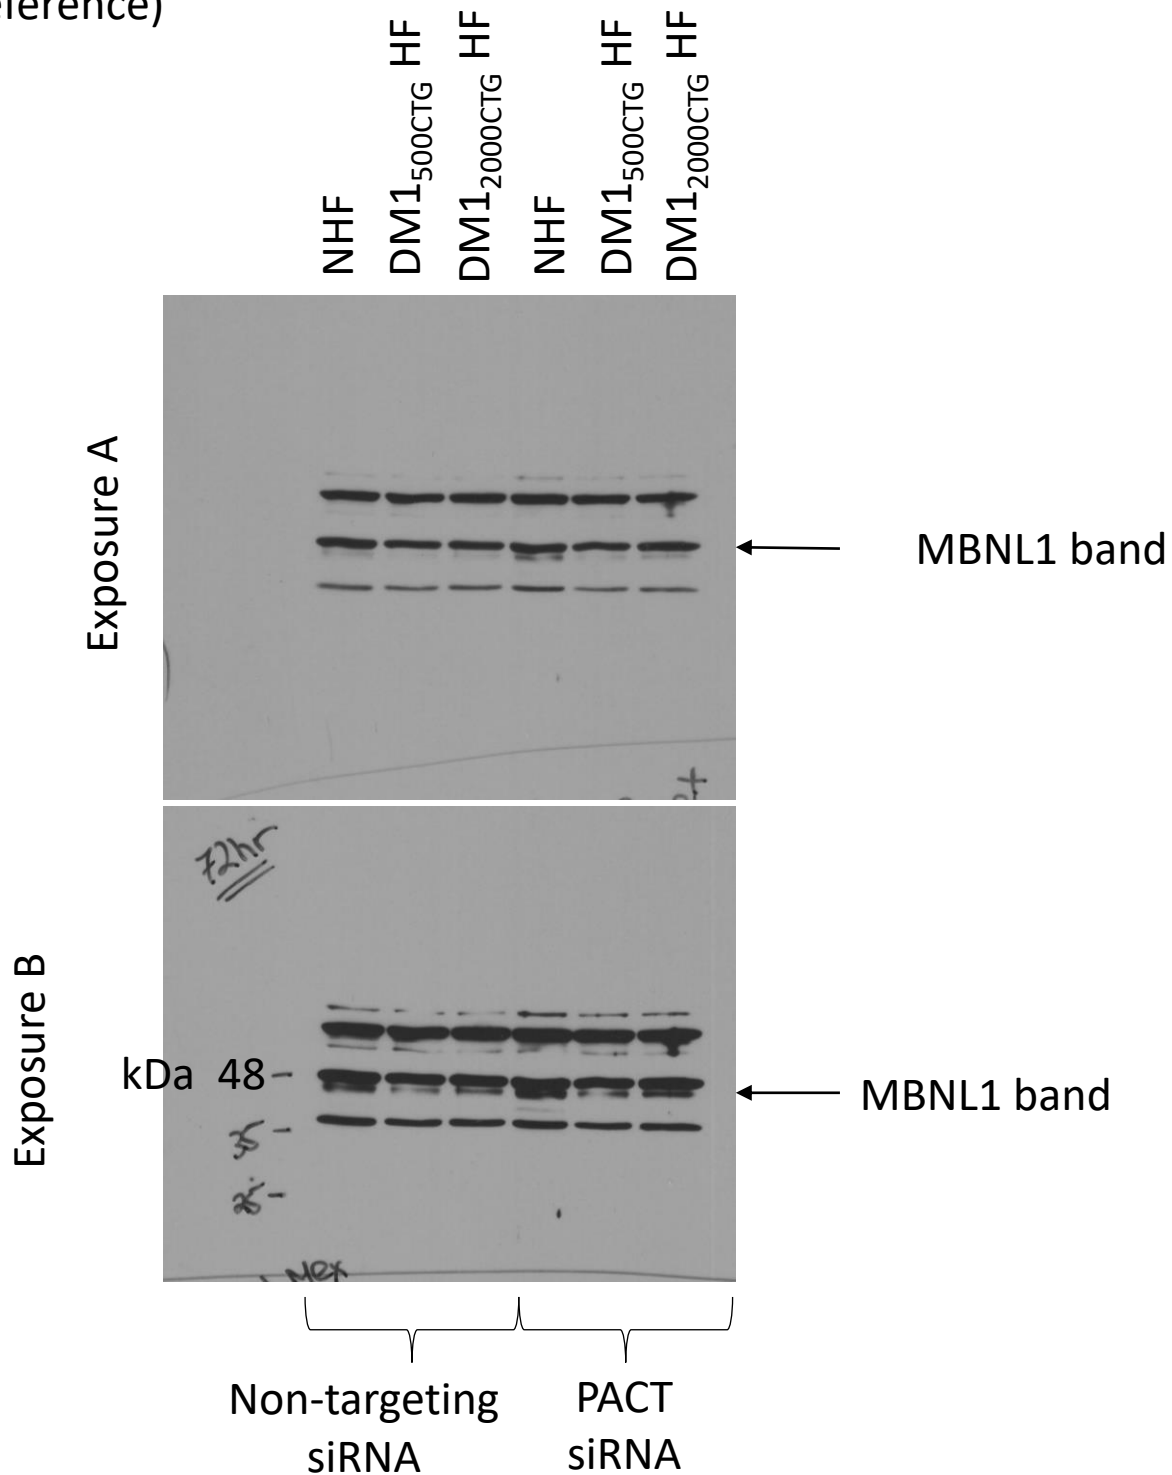

### Figure 3, Supplementary Figure 6A-B

#### Trial 1:

anti-HSP90 (film, chemiluminescence)

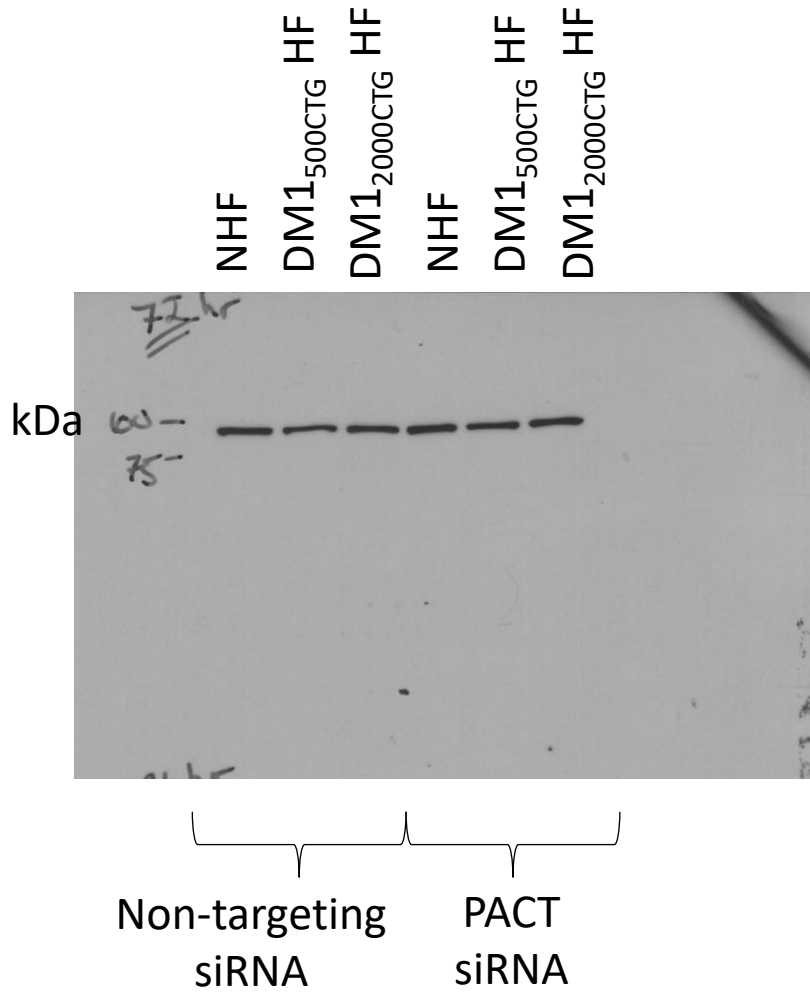

### Figure 3, Supplementary Figure 6A-B

#### Trial 2:

anti-PACT (film, chemiluminescence)

SS = Non-targeting siRNA

PACT = PACT siRNA

\*blot shows time-course of 24hr, 48hr, 72hr and 96hr siRNA treatment, but only 72hr bands were used in quantification

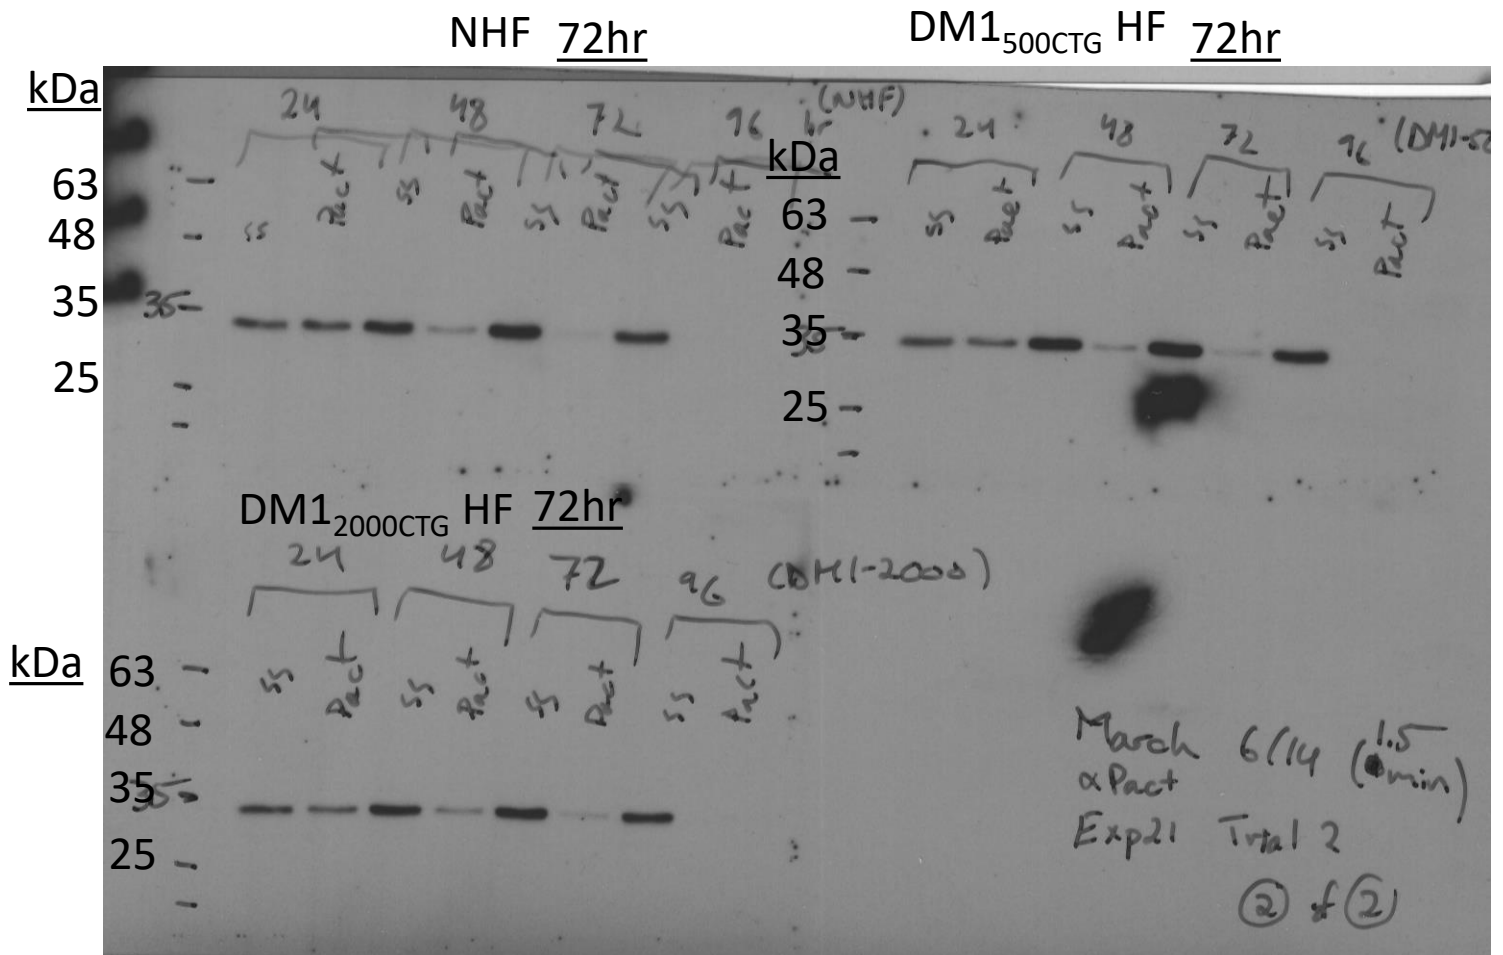

### Figure 3, Supplementary Figure 6A-B

#### Trial 2:

anti-MBNL1 (film, chemiluminescence)

Ss = Non-targeting siRNA

PACT = PACT siRNA

\*blot shows time-course of 24hr, 48hr, 72hr and 96hr siRNA treatment, but only 72hr bands were used in quantification

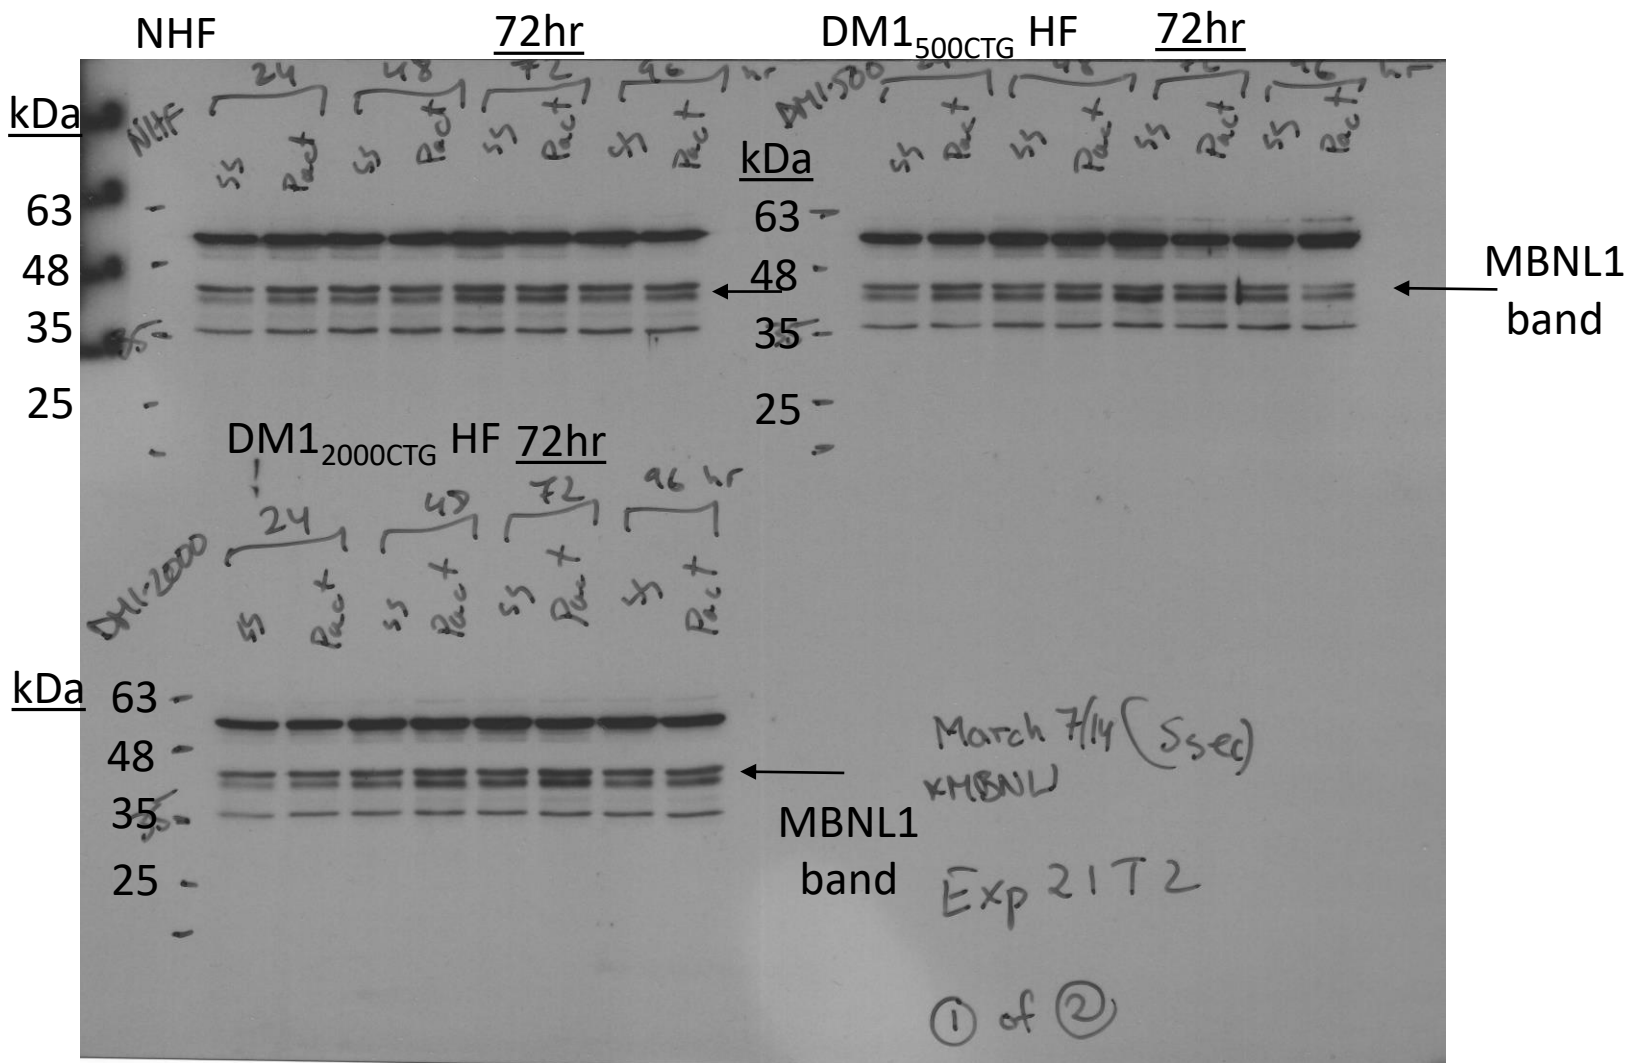

### Figure 3, Supplementary Figure 6A-B

#### Trial 2:

anti-HSP90 (film, chemiluminescence)

Ss = Non-targeting siRNA

P = PACT siRNA

\*blot shows time-course of 24hr, 48hr, 72hr and 96hr siRNA treatment, but only 72hr bands were used in quantification

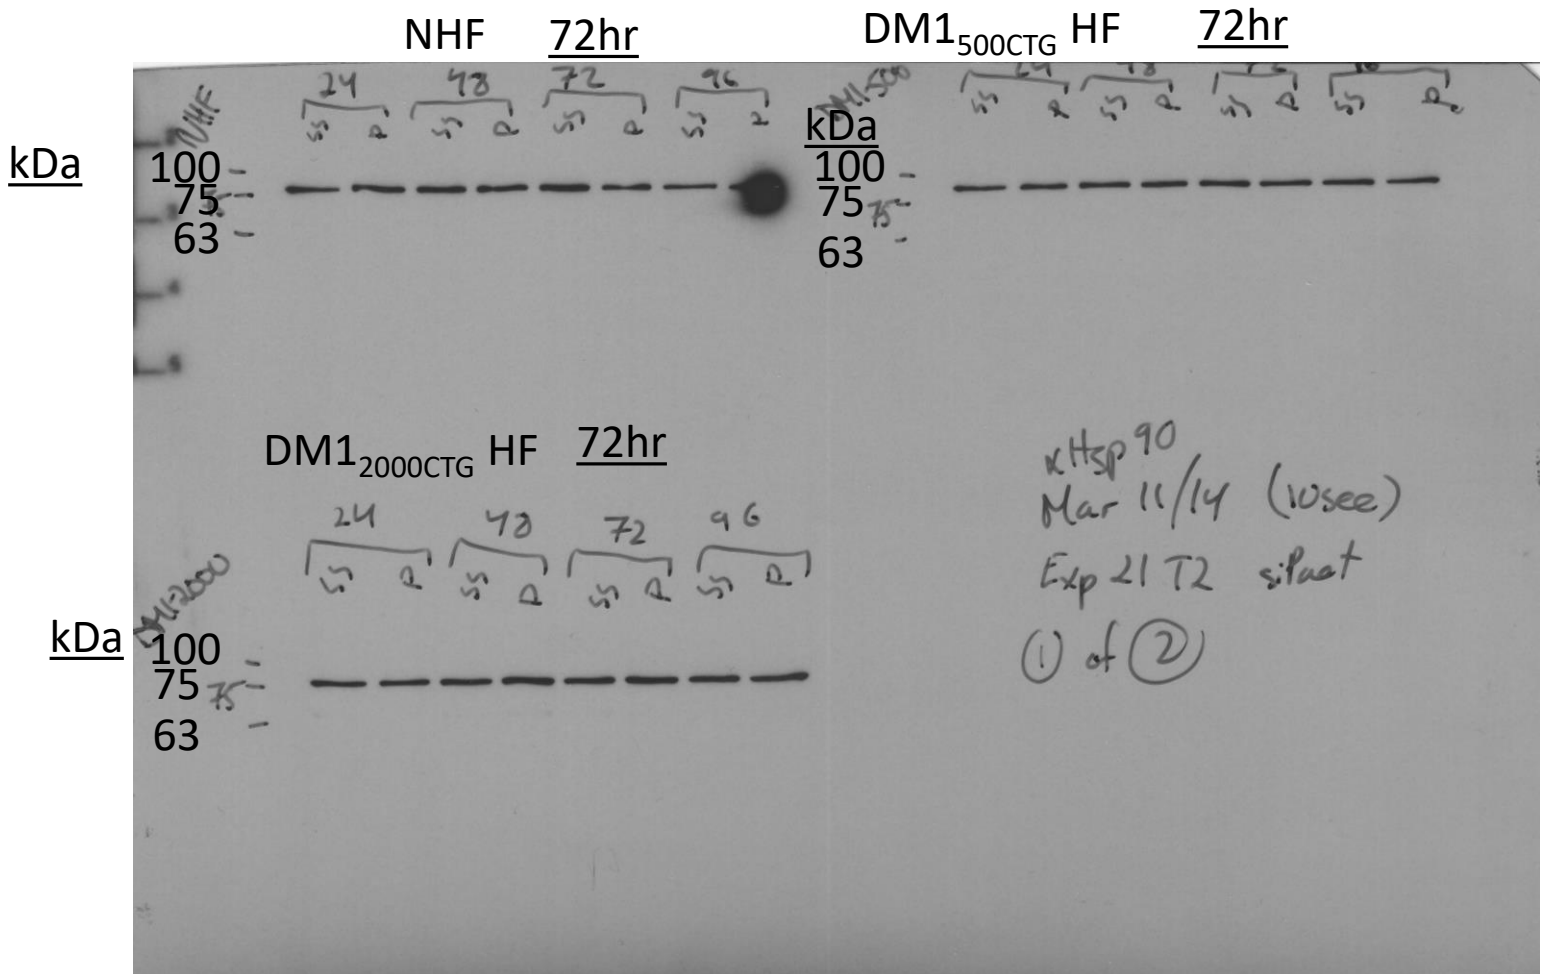

# Figure 3, Supplementary Figure 6A-B

## Trial 3:

anti-PACT (film, chemiluminescence)

SS = Non-targeting siRNA

PACT = PACT siRNA

\*blot shows time-course of 24hr, 48hr, 72hr and 96hr siRNA treatment, but only 72hr bands were used in quantification

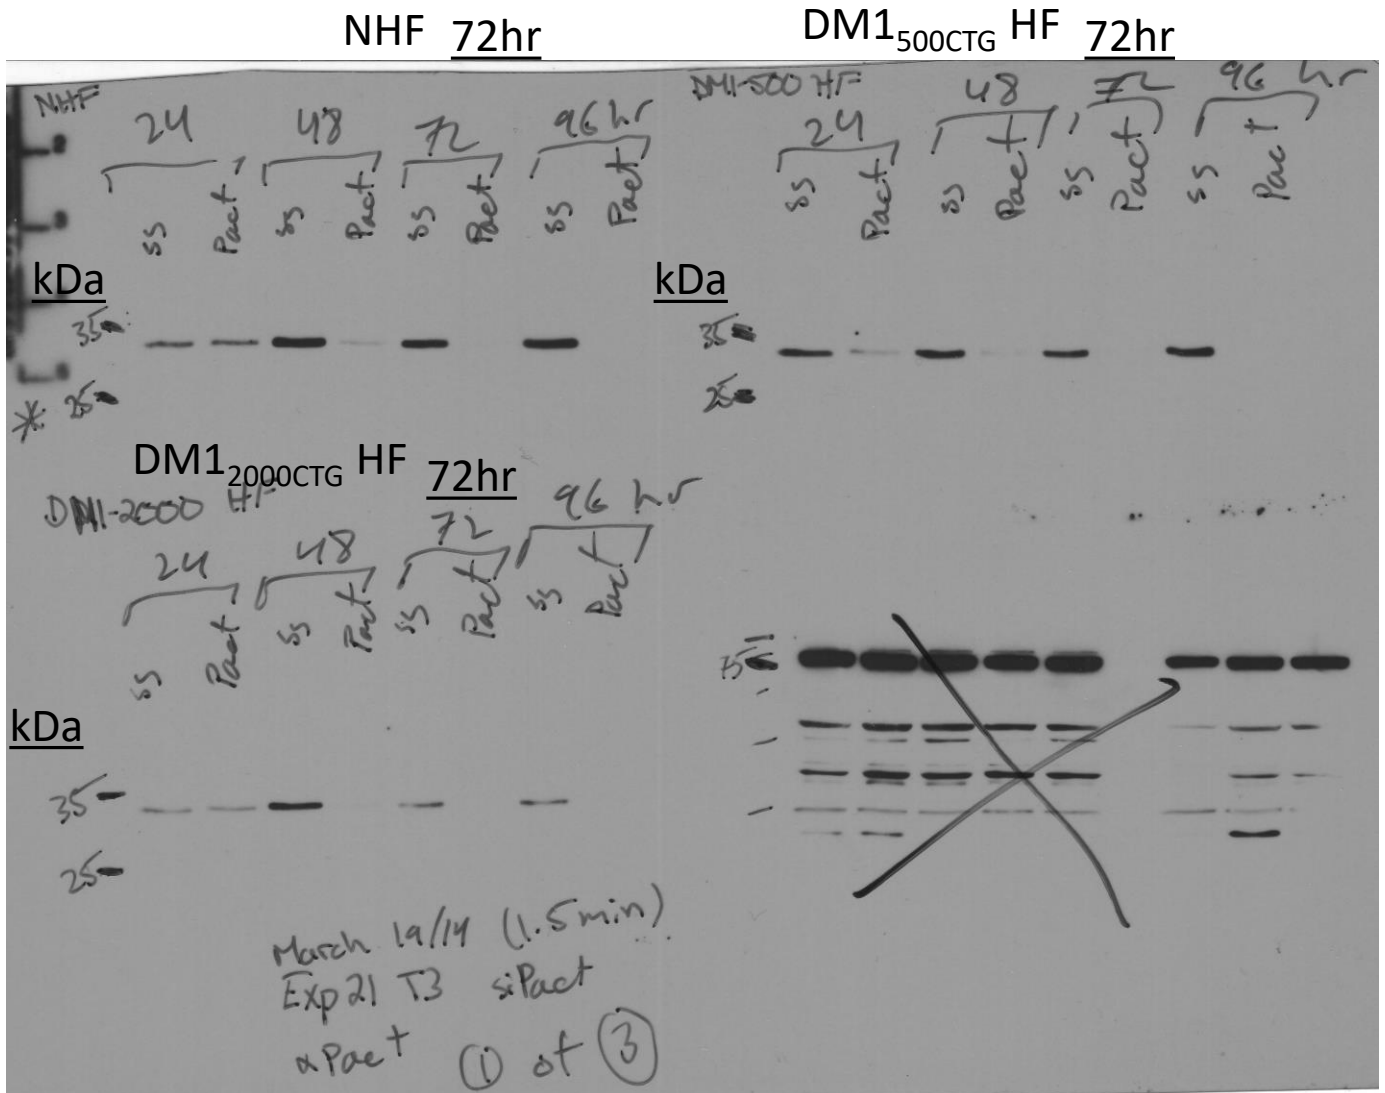

### Figure 3, Supplementary Figure 6A-B

#### Trial 3:

anti-MBNL1 (film, chemiluminescence)

C = Non-targeting siRNA

PACT = PACT siRNA

\*blot shows time-course of 24hr, 48hr, 72hr and 96hr siRNA treatment, but only 72hr bands were used in quantification

\* Check mark indicates MBNL1 bands

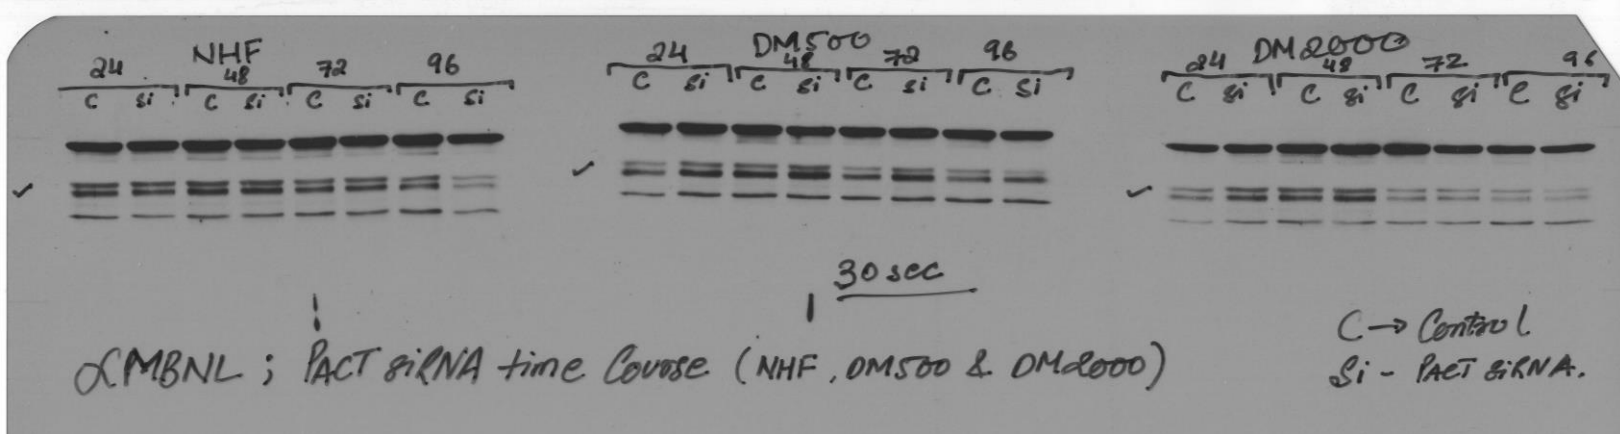



**Figure 3, Supplementary Figure 6A-B**

**Trial 3:**

anti-HSP90 (film, chemiluminescence)

ss = Non-targeting siRNA

PACT = PACT siRNA

\*blot shows time-course of 24hr, 48hr, 72hr and 96hr siRNA treatment, but only 72hr bands were used in quantification

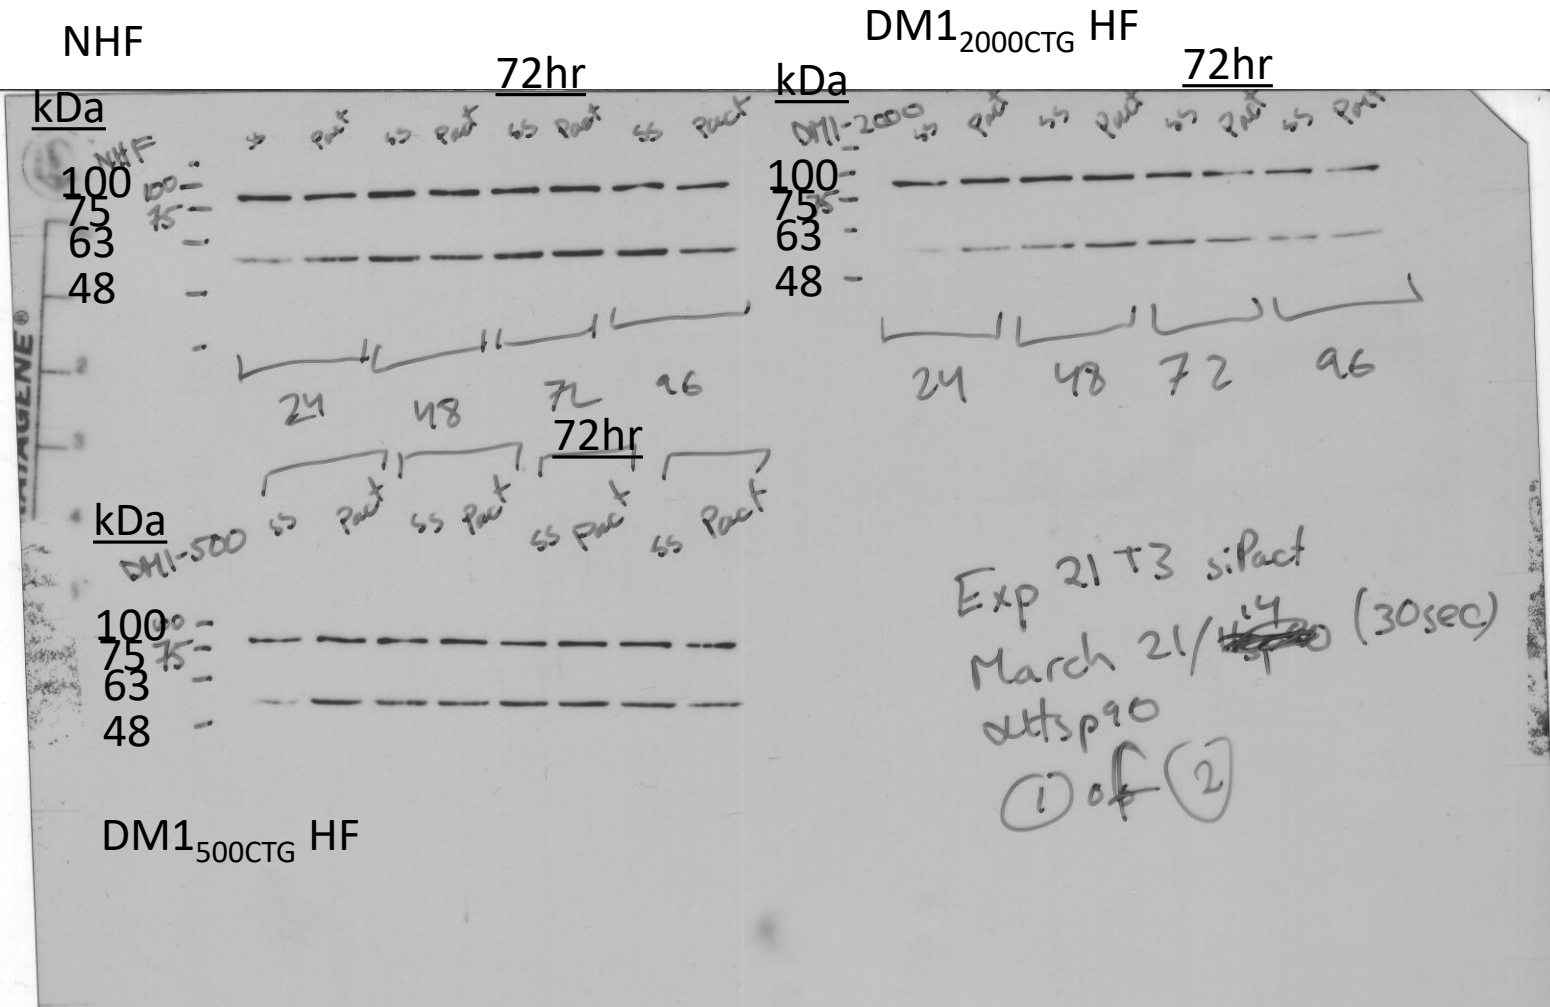

### Figure 3, Supplementary Figure 3, Supplementary Figure 6A-B

#### Trial 4:

anti-PACT (film, chemiluminescence)

SS = Non-targeting siRNA

PACT = PACT siRNA

\*blot shows time-course of 24hr, 48hr, 72hr and 96hr siRNA treatment, but only 72hr bands were used in quantification

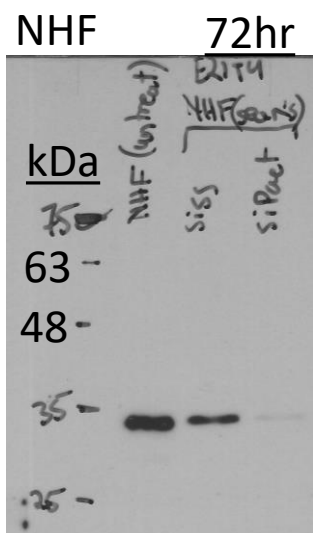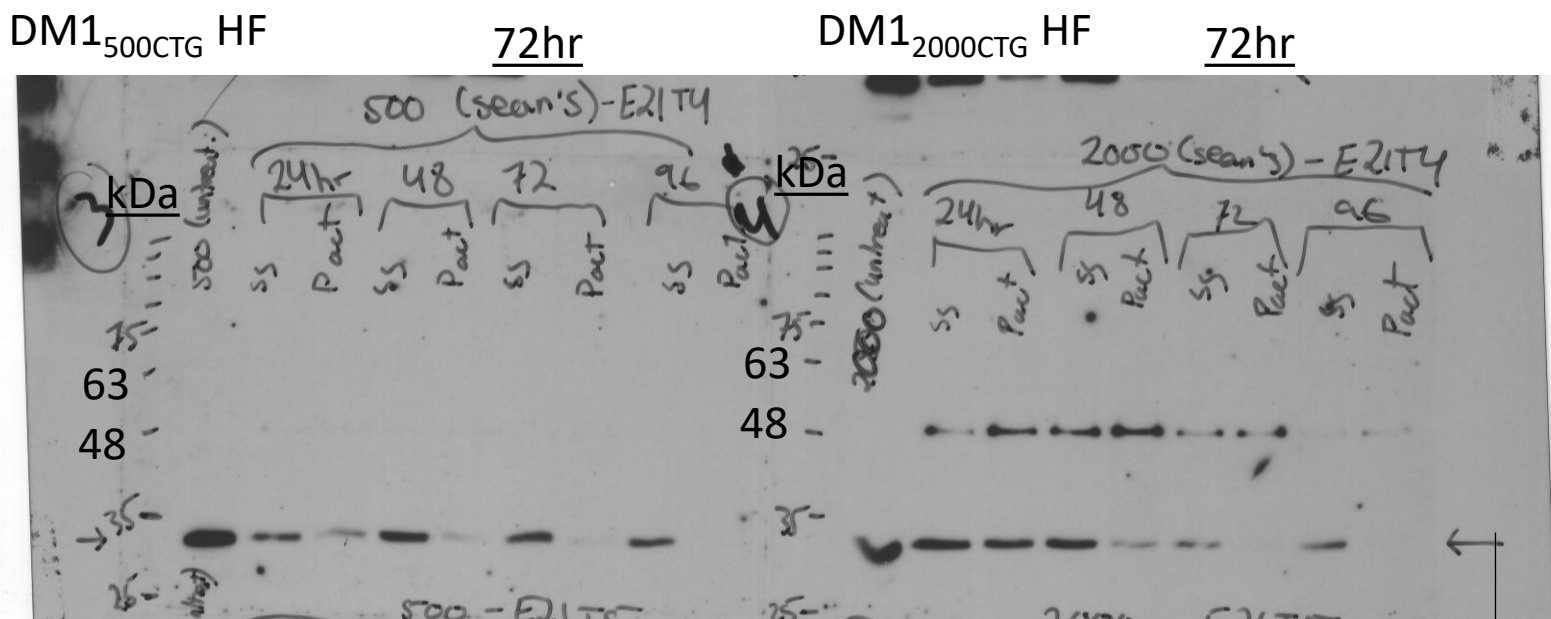

PACT band

### Figure 3, Supplementary Figure 6A-B

#### Trial 4:

anti-MBNL1 (film, chemiluminescence)

ss = Non-targeting siRNA

PACT = PACT siRNA

\*blot shows time-course of 24hr, 48hr, 72hr and 96hr siRNA treatment, but only 72hr bands were used in quantification

\* Check mark indicates MBNL1 bands

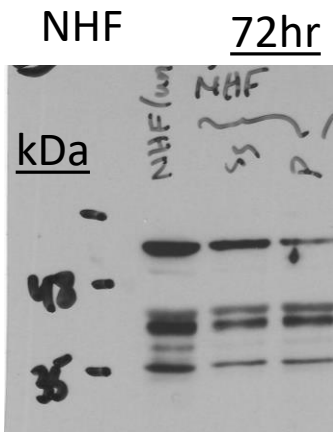

← MBNL1 band

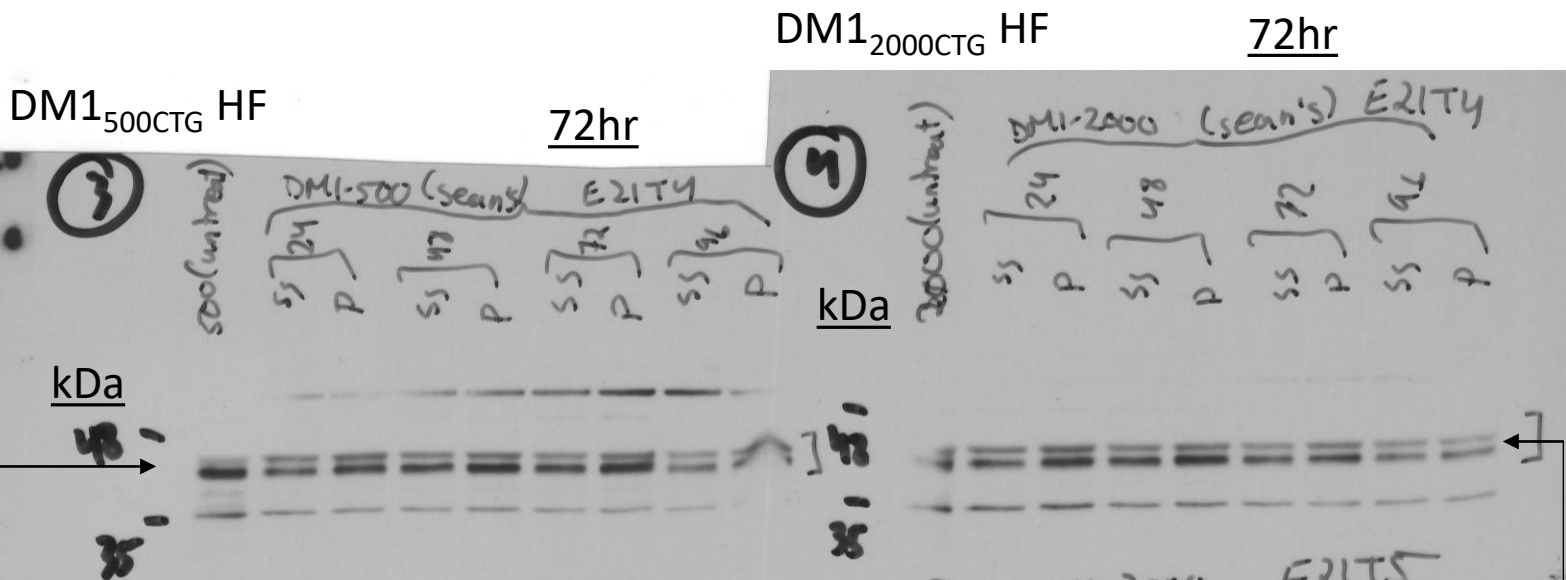

MBNL1 band

MBNL1 band

### Figure 3, Supplementary Figure 6A-B

#### Trial 4:

anti-HSP90 (film, chemiluminescence)

ss = Non-targeting siRNA

PACT = PACT siRNA

\*blot shows time-course of 24hr, 48hr, 72hr and 96hr siRNA treatment, but only 72hr bands were used in quantification

Western blot analysis of HSP90 protein levels in Normal Human Fibroblasts (NHF). The blot shows a single band at approximately 75 kDa, indicated by an arrow labeled "HSP90 band". Molecular weight markers are shown on the left at 75, 63, 48, and 35 kDa. The lanes are labeled as follows: NHF, untreated, SS (Non-targeting siRNA), and PACT (PACT siRNA). The 72hr time point is indicated above the SS and PACT lanes.

Western blot analysis of HSP90 protein levels in DM1 mutant Human Fibroblasts (HF). The blot is divided into two sections: DM1<sub>500CTG</sub> HF and DM1<sub>2000CTG</sub> HF. Each section shows a time-course of siRNA treatment (24hr, 48hr, 72hr, 96hr) for both SS (Non-targeting siRNA) and PACT (PACT siRNA) conditions. The 72hr time point is indicated above the SS and PACT lanes for each time point.

Detailed Western blot analysis of HSP90 protein levels in DM1 mutant HF cells. The blot shows HSP90 bands at approximately 75 kDa and 48 kDa. Molecular weight markers are shown on the left at 75, 63, 48, and 35 kDa. The lanes are labeled as follows: DM1<sub>500CTG</sub> HF (untreated, 24hr, 48hr, 72hr, 96hr) and DM1<sub>2000CTG</sub> HF (untreated, 24hr, 48hr, 72hr, 96hr). The 72hr time point is indicated above the SS and PACT lanes for each time point. A circled '3' is present on the left side of the blot, and a circled 'u' is present above the 75 kDa marker.

HSP90 band

HSP90 band

## Supplementary Figure 2

anti-PACT (film, chemiluminescence) – blots used in final figure are squared  
CTR = non-targeting siRNA; 24, 48, 72, 96 (hr) = time-course with PACT siRNA

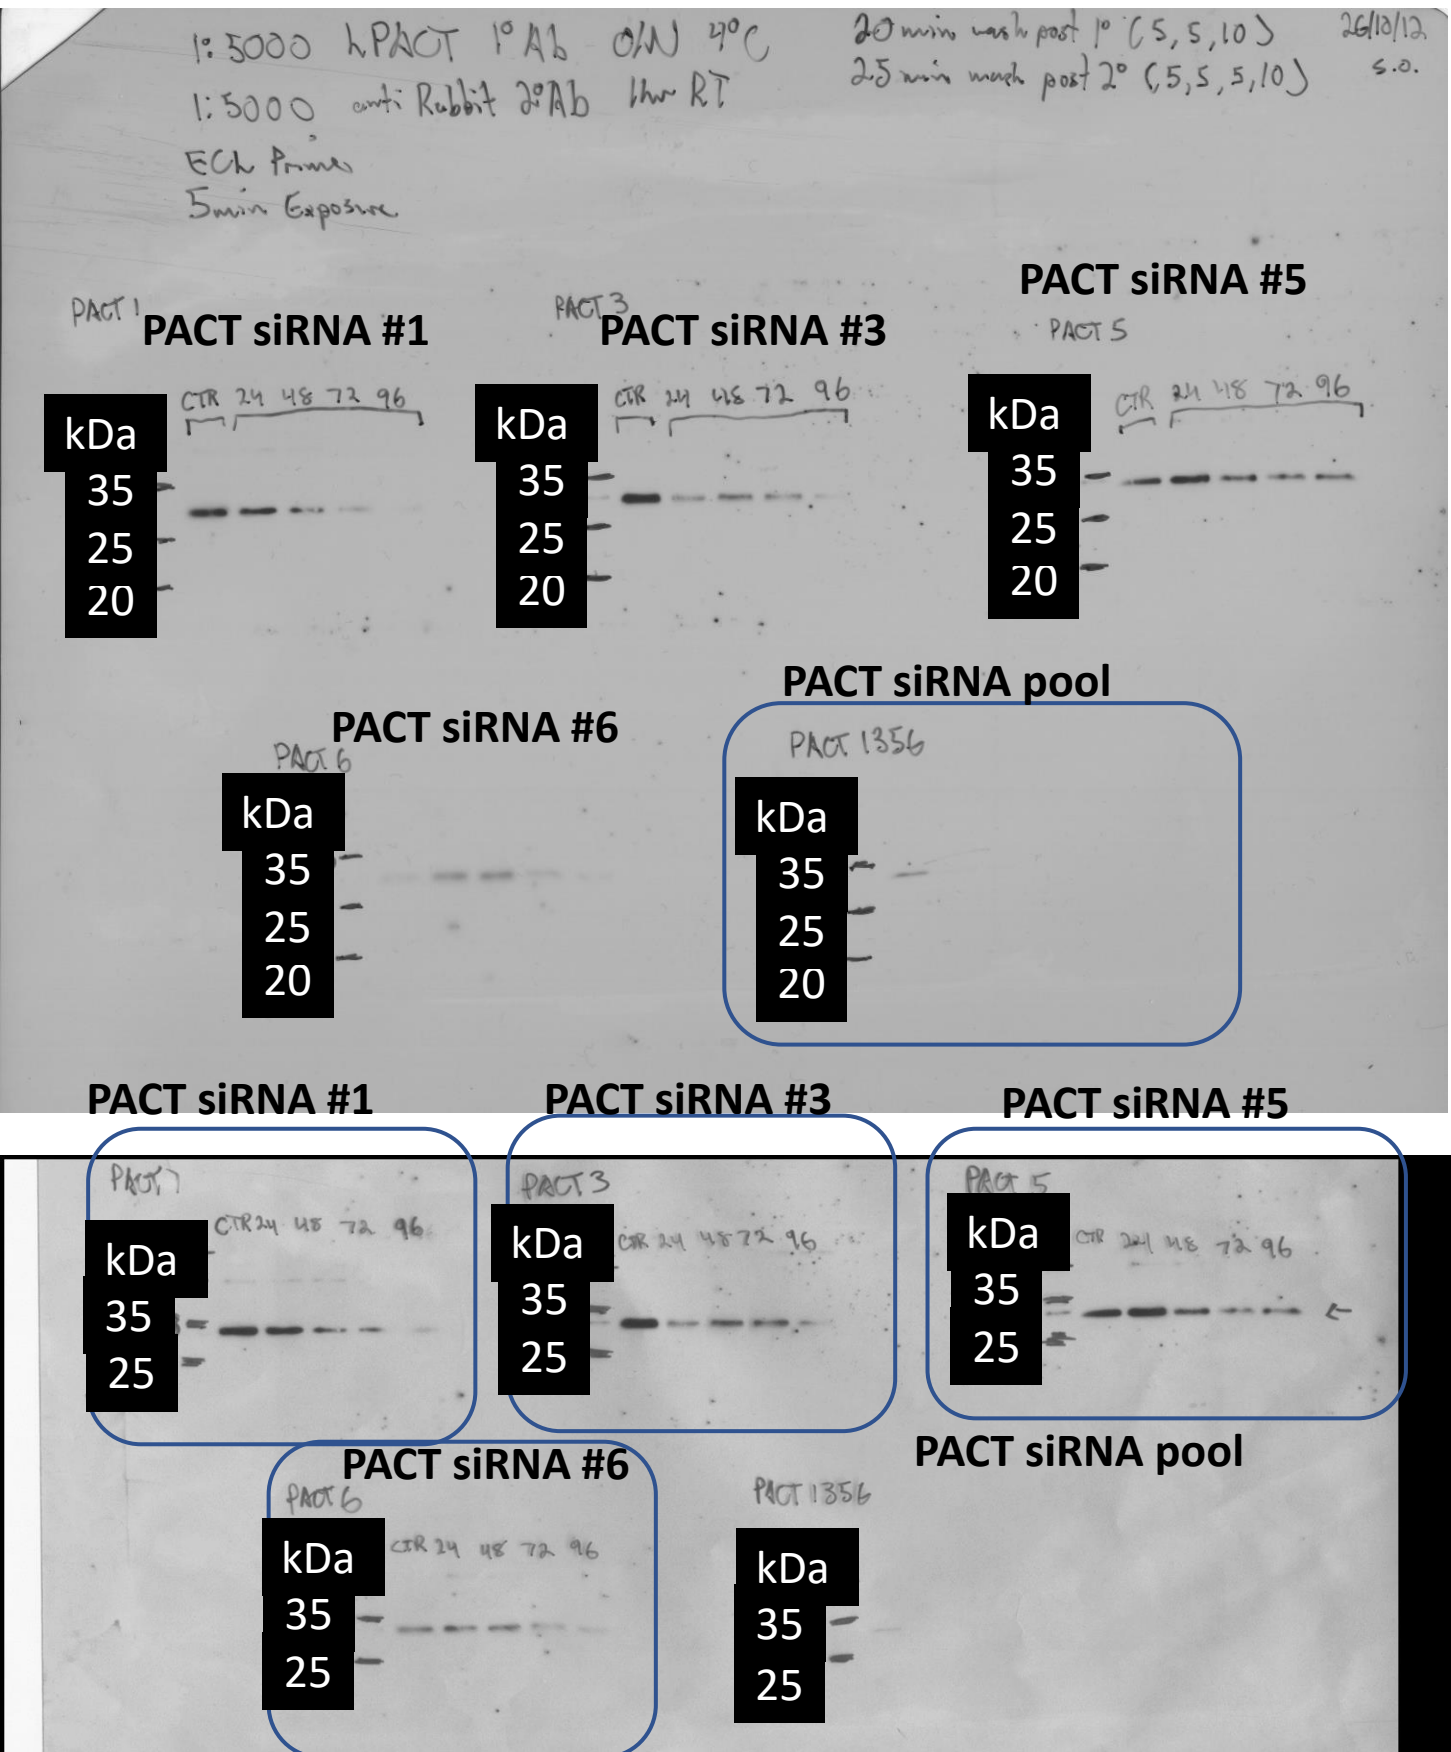

## Supplementary Figure 2

anti-Tubulin (film, chemiluminescence)

CTR = non-targeting siRNA; 24, 48, 72, 96 (hr) = time-course with PACT siRNA

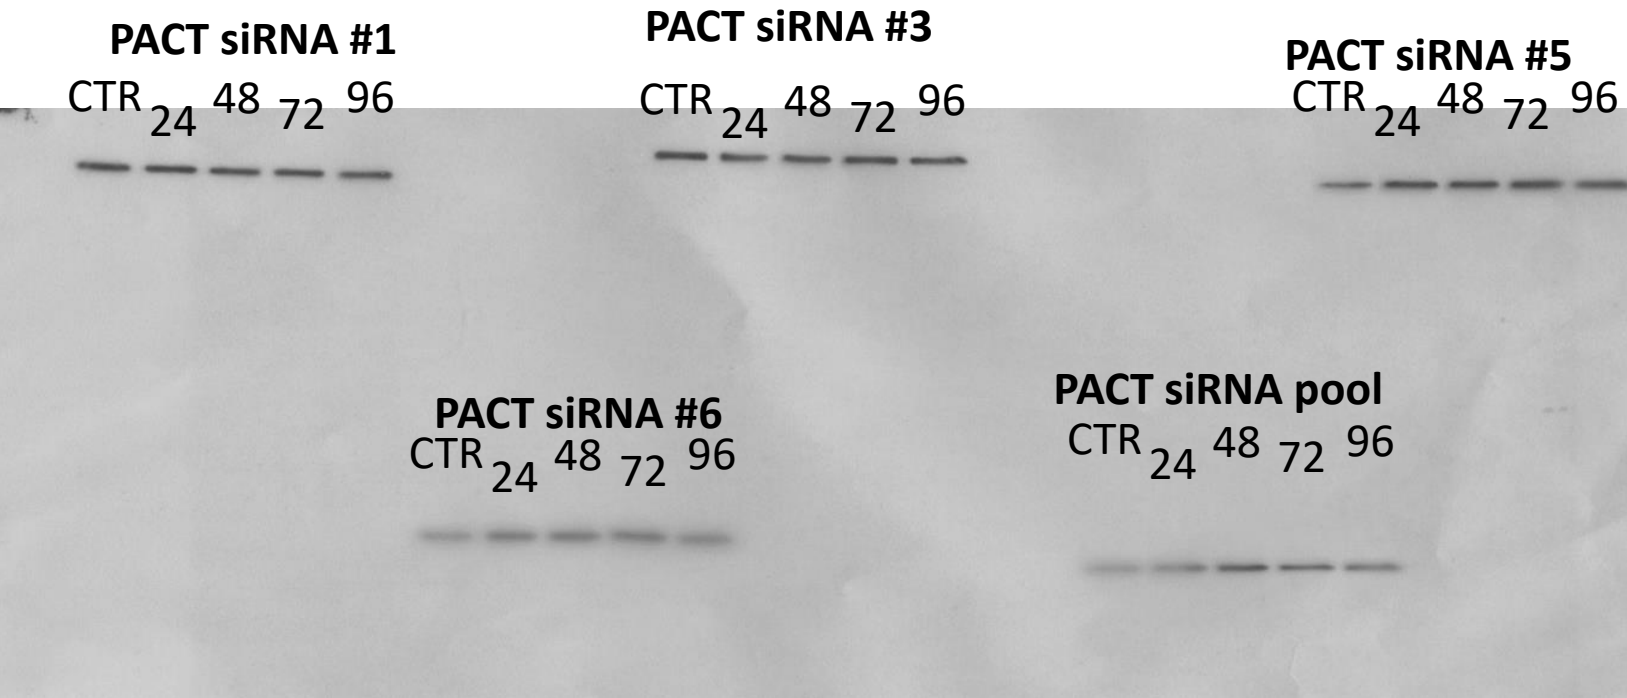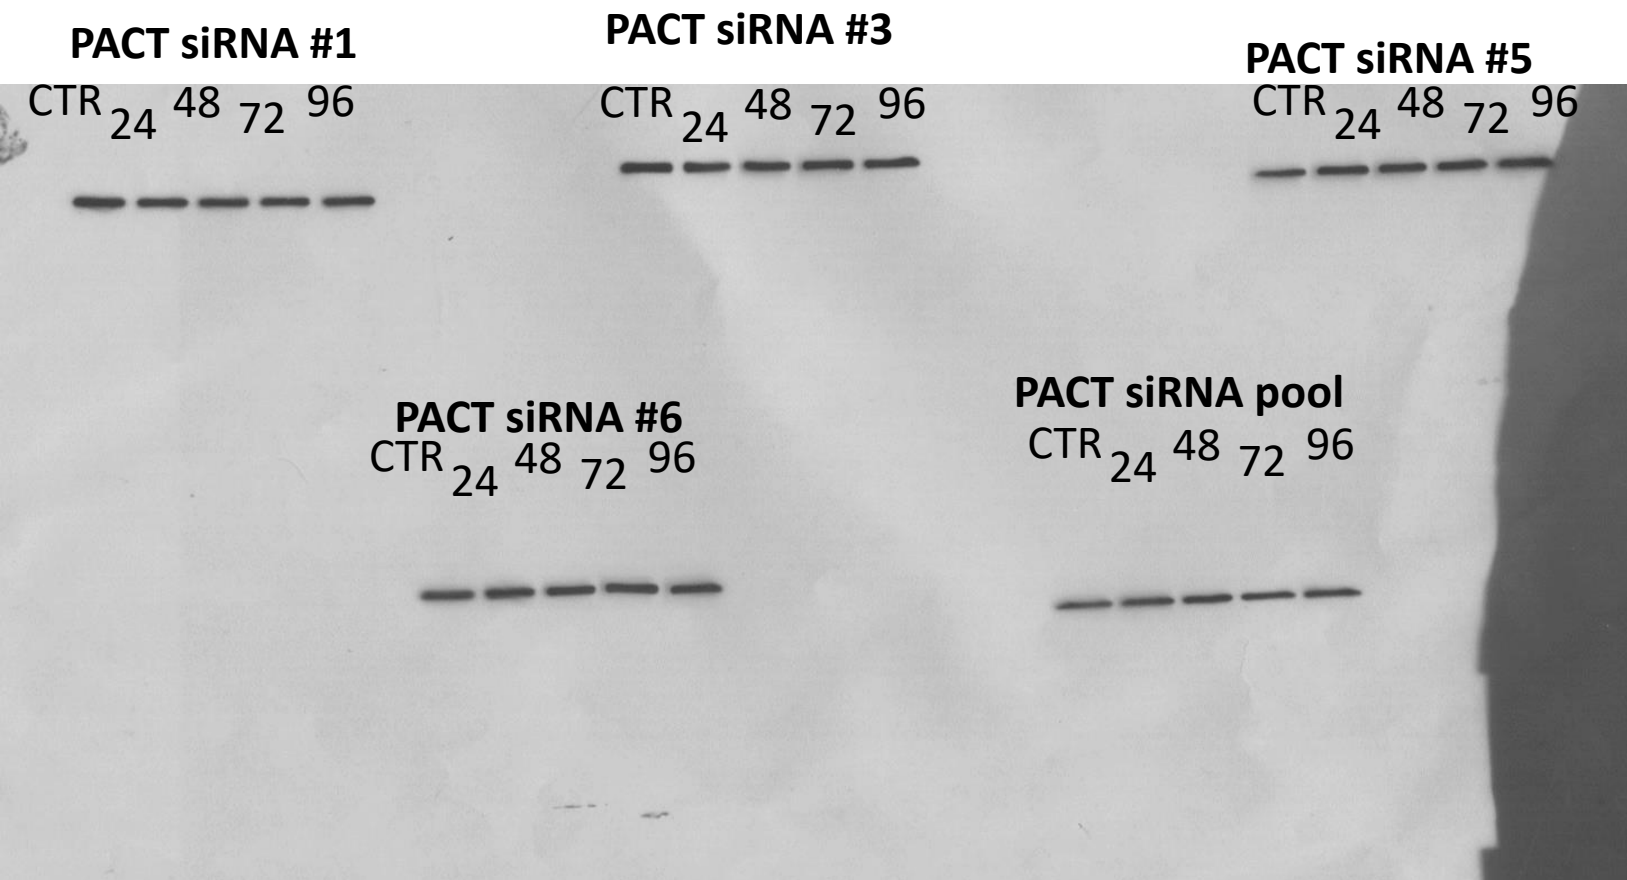

# Supplementary Figure 3A-B

## anti-PACT (film, chemiluminescence)

SS = Non-targeting siRNA

PACT = PACT siRNA

### DM1<sub>500CTG</sub> HF

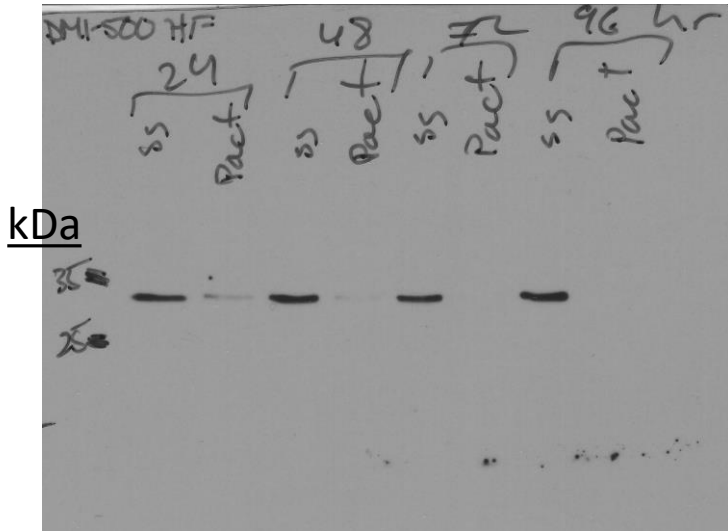

### DM1<sub>2000CTG</sub> HF

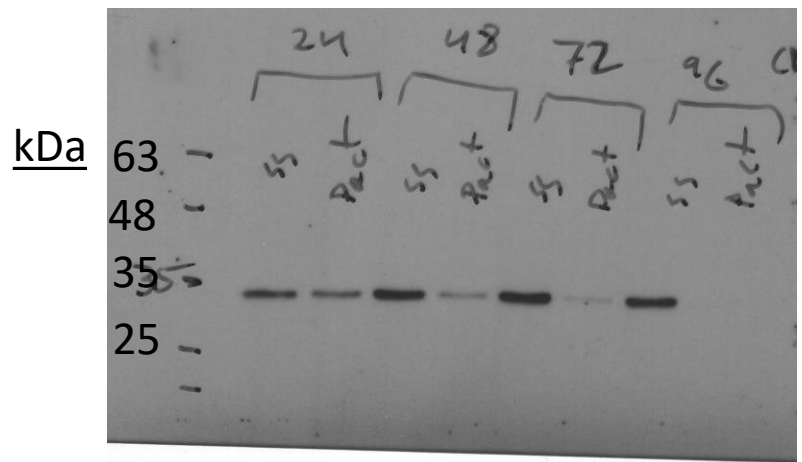

## anti-HSP90 (film, chemiluminescence)

ss = Non-targeting siRNA

PACT = PACT siRNA

### DM1<sub>500CTG</sub> HF

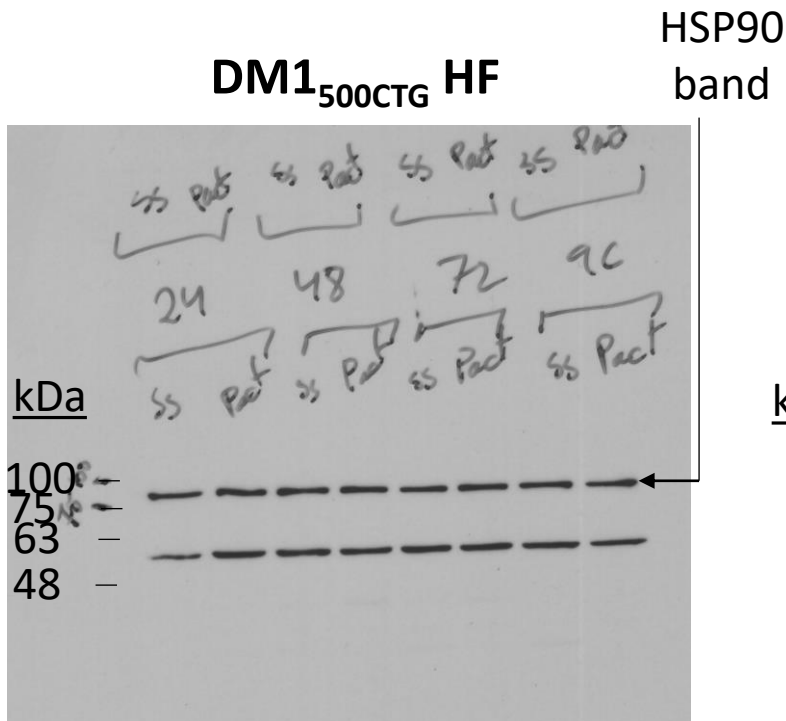

### DM1<sub>2000CTG</sub> HF

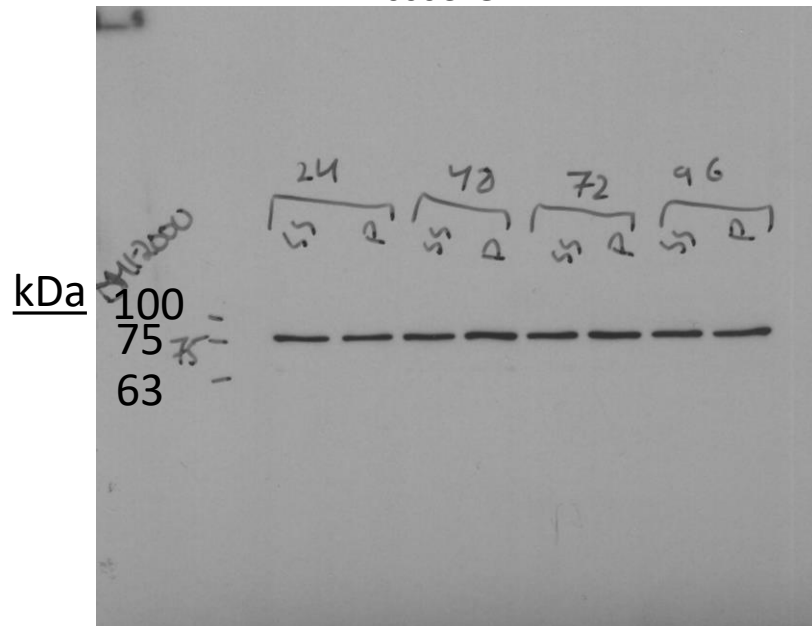

## Supplementary Figure 7

anti-Pact (Chemidoc,  
chemiluminescence)

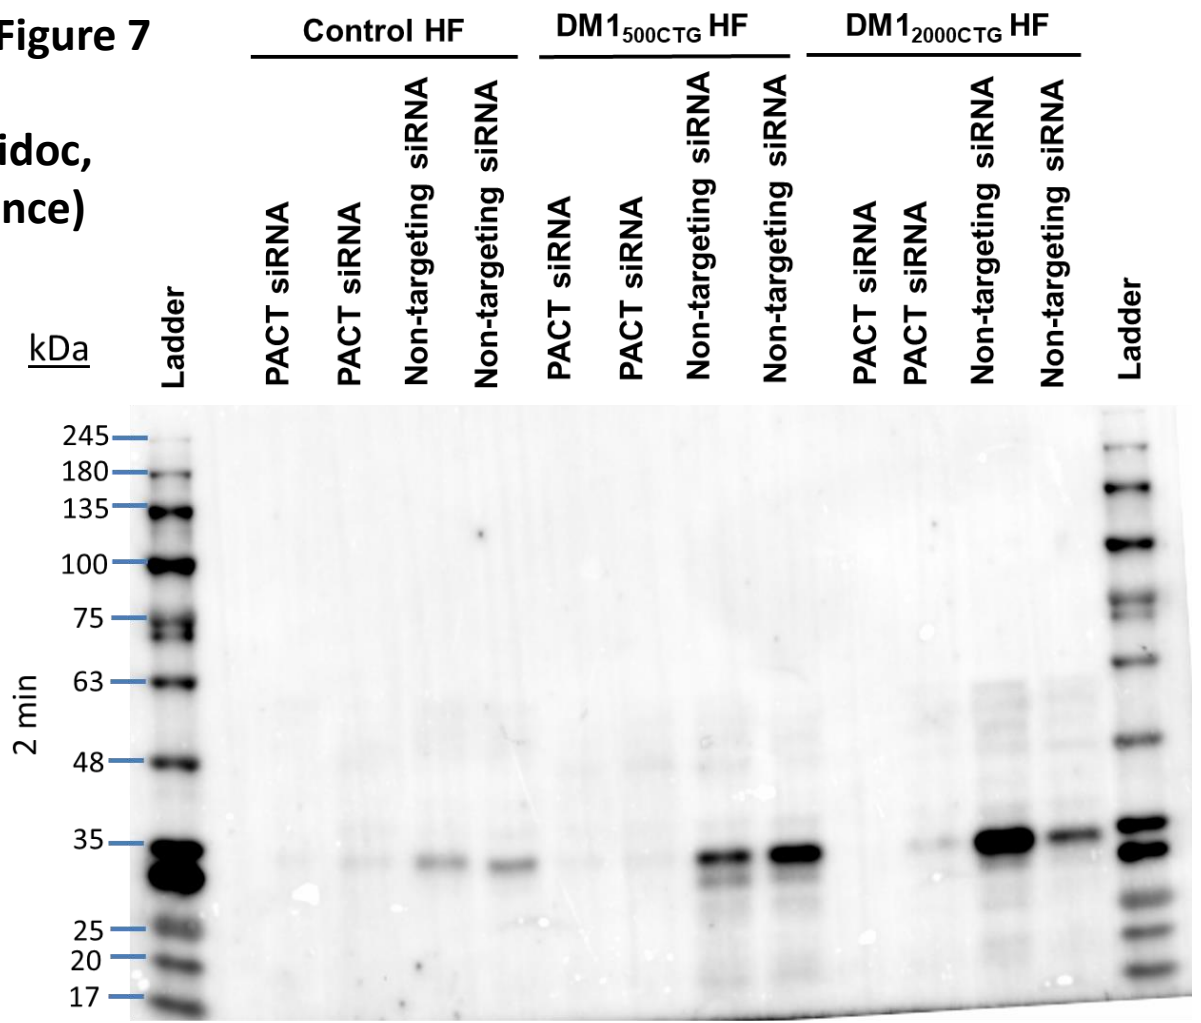

Stain-free for anti-Pact  
blot (Chemidoc)

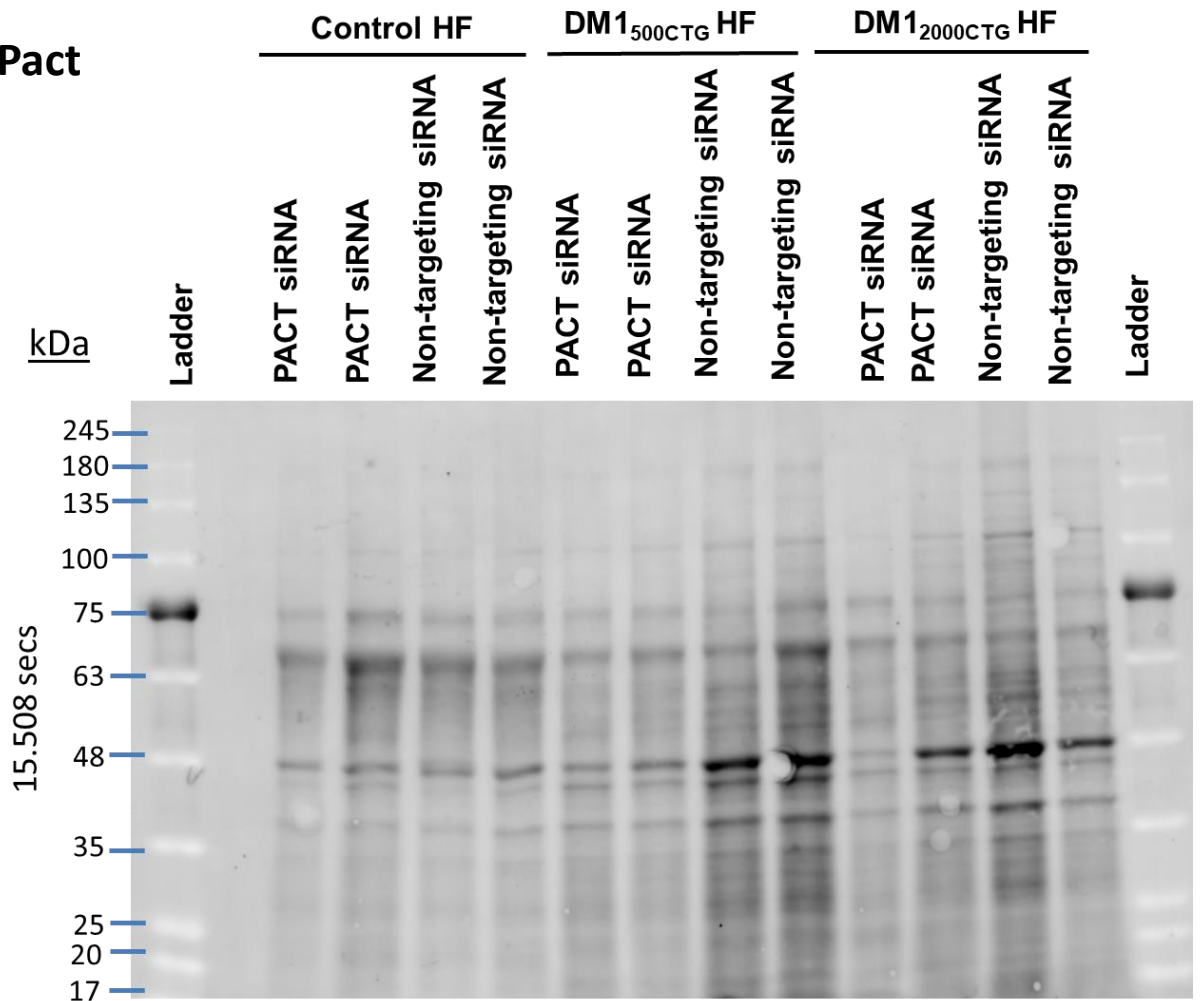



# Supplementary Figure 7

anti-PKR (Chemidoc,  
chemiluminescence)

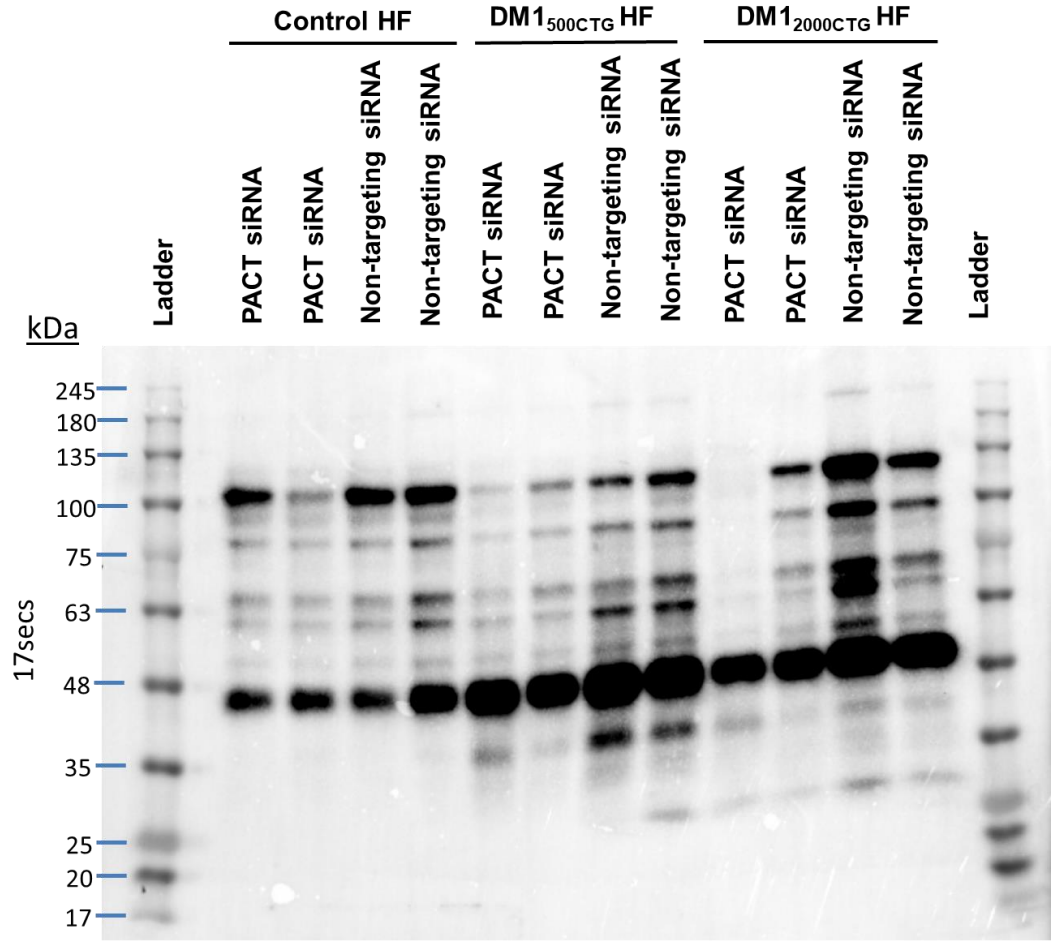

Stain-free for anti-PKR blot  
(Chemidoc)

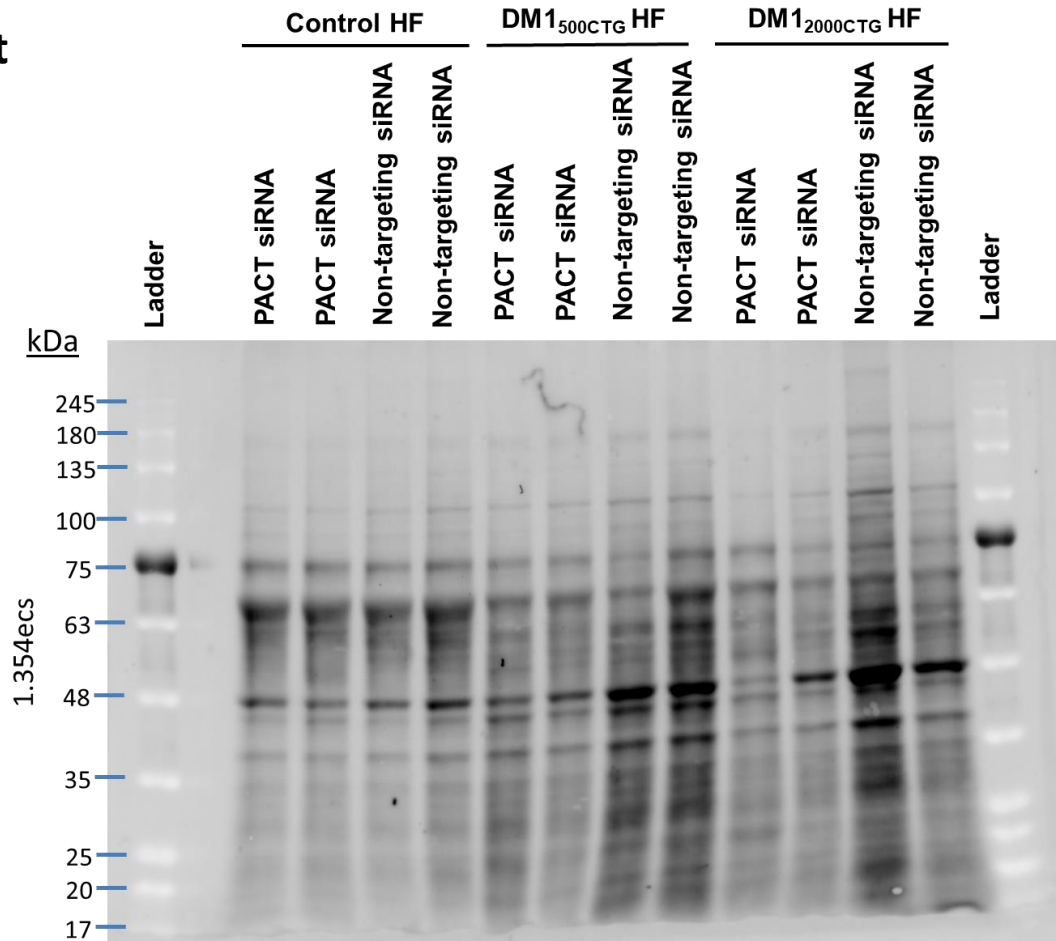

**Supplementary Figure 7**

**anti-pPKR (T446) (chemidoc, chemiluminescence)**

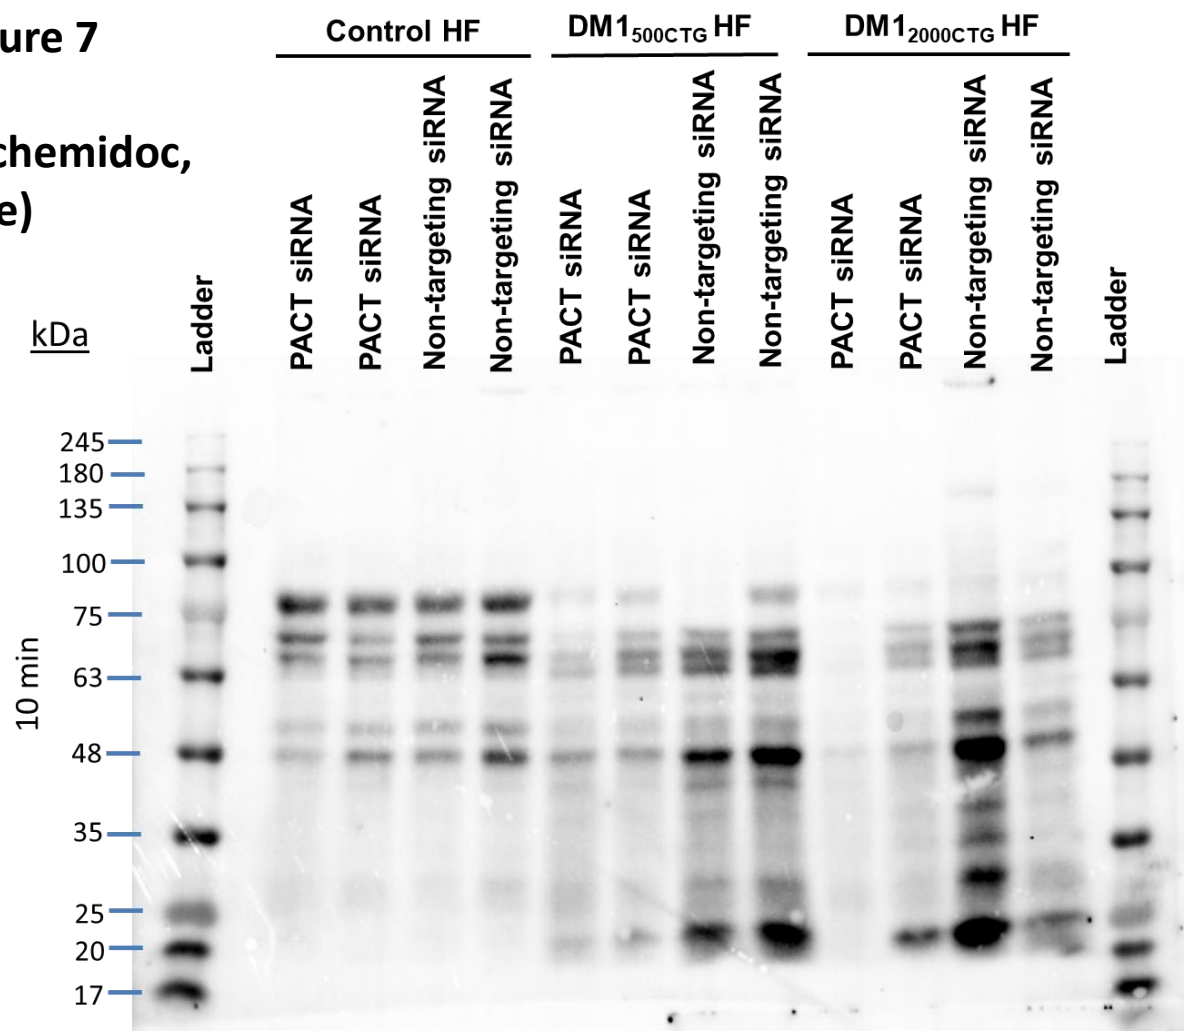

**Stain-free for anti-pPKR (T446) blot (Chemidoc)**

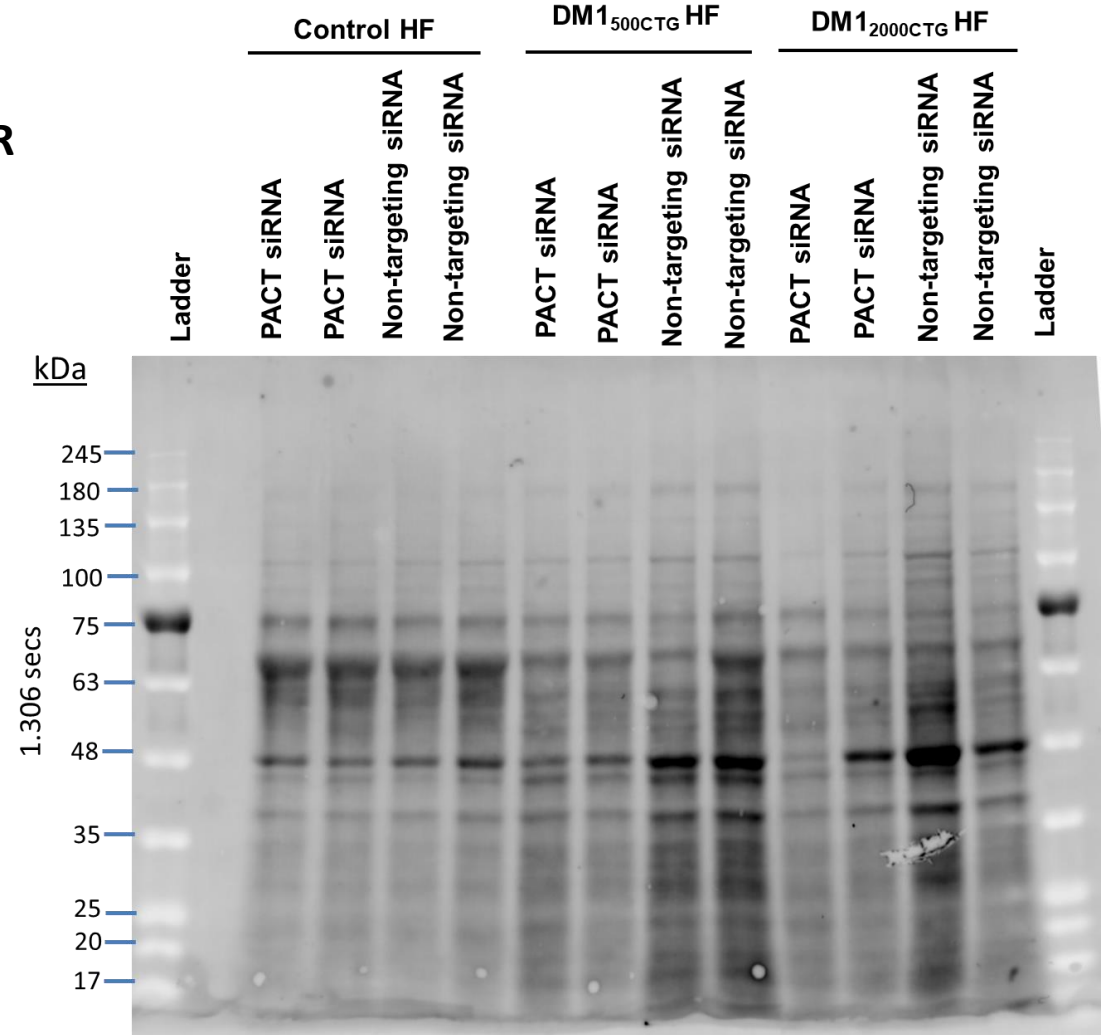

Supplement: pone.0256276.s014.pdf [file pone.0256276.s014.pdf]
