# Supplementary material for: High-throughput kinome-RNAi screen identifies protein kinase R activator (PACT) as a novel genetic modifier of CUG foci integrity in myotonic dystrophy type 1 (DM1)
Source: PubMed Central journal article supplement (PMC8439471; doi:10.1371/journal.pone.0256276), 2021-09-14
Supplement: pone.0256276.s001.pdf [file pone.0256276.s001.pdf]

| siRNA     | Plate    | Well Name | Row | Column | Z-score (nuclei count) | Z-score (foci count) | Z-score (foci area) |
|-----------|----------|-----------|-----|--------|------------------------|----------------------|---------------------|
| PRKAA1    | hKQsi002 | B3        | 2   | 3      | 0.05                   | 1.51                 | 1.53                |
| PRKCA     | hKQsi002 | B4        | 2   | 4      | 0.58                   | 0.19                 | 0.47                |
| PRKG2     | hKQsi002 | B5        | 2   | 5      | -0.03                  | 0.29                 | 0.45                |
| MAP2K5    | hKQsi002 | B6        | 2   | 6      | 0.40                   | 0.51                 | 0.38                |
| RAGE      | hKQsi002 | B7        | 2   | 7      | 0.24                   | -0.72                | -0.24               |
| SGK       | hKQsi002 | B8        | 2   | 8      | -1.41                  | -0.31                | -0.44               |
| AURKA     | hKQsi002 | B10       | 2   | 10     | 0.36                   | -0.39                | -0.72               |
| TK2       | hKQsi002 | B11       | 2   | 11     | -0.46                  | 0.10                 | 0.18                |
| MAP3K12   | hKQsi002 | B12       | 2   | 12     | -0.42                  | 0.25                 | 0.03                |
| IKBKG     | hKQsi002 | B13       | 2   | 13     | -0.44                  | -0.98                | -0.62               |
| CDC2L5    | hKQsi002 | B14       | 2   | 14     | 0.12                   | -0.73                | -0.71               |
| CDK5R2    | hKQsi002 | B15       | 2   | 15     | -0.57                  | -0.11                | -1.22               |
| DGKI      | hKQsi002 | B17       | 2   | 17     | -1.32                  | -1.38                | -0.70               |
| AKAP6     | hKQsi002 | B18       | 2   | 18     | 0.01                   | 0.26                 | -0.11               |
| ARK5      | hKQsi002 | B19       | 2   | 19     | 1.48                   | 0.14                 | -0.26               |
| PAK4      | hKQsi002 | B20       | 2   | 20     | -0.03                  | -1.07                | -0.46               |
| NEK6      | hKQsi002 | B21       | 2   | 21     | -0.46                  | -0.33                | -0.36               |
| AKAP11    | hKQsi002 | B22       | 2   | 22     | 0.89                   | -1.36                | -1.08               |
| PRKAA2    | hKQsi002 | C3        | 3   | 3      | 0.39                   | 0.74                 | 0.35                |
| PRKCB1    | hKQsi002 | C4        | 3   | 4      | 0.51                   | 0.54                 | 0.28                |
| MAPK1     | hKQsi002 | C5        | 3   | 5      | -1.13                  | 0.42                 | 0.23                |
| MAP2K6    | hKQsi002 | C6        | 3   | 6      | -0.02                  | -0.51                | -0.40               |
| RAF1      | hKQsi002 | C7        | 3   | 7      | 0.44                   | 0.30                 | 0.25                |
| SKP1A     | hKQsi002 | C8        | 3   | 8      | -0.06                  | -0.23                | -0.04               |
| CDKL5     | hKQsi002 | C10       | 3   | 10     | 0.94                   | -1.17                | -0.91               |
| TRIO      | hKQsi002 | C11       | 3   | 11     | 0.14                   | -0.35                | -0.32               |
| MAPKAPK3  | hKQsi002 | C12       | 3   | 12     | -0.68                  | 1.58                 | 1.41                |
| IKBKAP    | hKQsi002 | C13       | 3   | 13     | -0.44                  | -0.62                | -0.93               |
| MAP2K1IP1 | hKQsi002 | C14       | 3   | 14     | -0.94                  | -1.28                | -0.32               |
| RPS6KA4   | hKQsi002 | C15       | 3   | 15     | -0.41                  | 0.85                 | -0.16               |
| MAP3K13   | hKQsi002 | C17       | 3   | 17     | -0.77                  | -1.11                | -0.54               |
| ROCK2     | hKQsi002 | C18       | 3   | 18     | -0.62                  | -0.58                | -0.35               |
| XYLB      | hKQsi002 | C19       | 3   | 19     | 0.26                   | -0.64                | -0.52               |
| TESK2     | hKQsi002 | C20       | 3   | 20     | 1.65                   | -1.32                | -1.13               |
| FASTK     | hKQsi002 | C21       | 3   | 21     | 0.06                   | -0.11                | 0.03                |

|           |          |     |   |    |       |       |       |
|-----------|----------|-----|---|----|-------|-------|-------|
| AKAP10    | hKQsi002 | C22 | 3 | 22 | 4.73  | -0.17 | -0.46 |
| PRKAB1    | hKQsi002 | D3  | 4 | 3  | 1.19  | -0.45 | -0.66 |
| PRKCD     | hKQsi002 | D4  | 4 | 4  | -0.24 | -0.88 | -1.26 |
| MAPK3     | hKQsi002 | D5  | 4 | 5  | 3.08  | 0.79  | 0.36  |
| MAP2K7    | hKQsi002 | D6  | 4 | 6  | -0.77 | -0.48 | -0.31 |
| RET       | hKQsi002 | D7  | 4 | 7  | -0.34 | -0.04 | -0.02 |
| SKP2      | hKQsi002 | D8  | 4 | 8  | -1.46 | 0.25  | 0.81  |
| STK10     | hKQsi002 | D10 | 4 | 10 | -0.11 | 0.46  | 0.34  |
| TTK       | hKQsi002 | D11 | 4 | 11 | -2.37 | 0.94  | 1.10  |
| AKAP1     | hKQsi002 | D12 | 4 | 12 | -1.32 | -0.02 | -0.42 |
| DGKZ      | hKQsi002 | D13 | 4 | 13 | 0.44  | -1.32 | -1.36 |
| TNK1      | hKQsi002 | D14 | 4 | 14 | 0.77  | 0.34  | 0.10  |
| CDKL2     | hKQsi002 | D15 | 4 | 15 | 0.35  | -0.35 | -0.90 |
| DCAMKL1   | hKQsi002 | D17 | 4 | 17 | 0.60  | 0.58  | 0.46  |
| MAPK8IP1  | hKQsi002 | D18 | 4 | 18 | -0.11 | -1.11 | -0.80 |
| OSR1      | hKQsi002 | D19 | 4 | 19 | 1.38  | -0.57 | -1.18 |
| MAP3K7IP1 | hKQsi002 | D20 | 4 | 20 | -0.80 | -0.08 | 0.82  |
| ASK       | hKQsi002 | D21 | 4 | 21 | -0.36 | 0.08  | 0.27  |
| PACSIN2   | hKQsi002 | D22 | 4 | 22 | -0.25 | 0.09  | 1.00  |
| PRKAB2    | hKQsi002 | E3  | 5 | 3  | 2.10  | 1.18  | 0.98  |
| PRKCE     | hKQsi002 | E4  | 5 | 4  | -0.46 | -0.76 | -0.80 |
| MAPK4     | hKQsi002 | E5  | 5 | 5  | 1.21  | 1.50  | 0.69  |
| PRKR      | hKQsi002 | E6  | 5 | 6  | -0.90 | -0.60 | -0.20 |
| GRK1      | hKQsi002 | E7  | 5 | 7  | 1.26  | -0.96 | -0.75 |
| SRC       | hKQsi002 | E8  | 5 | 8  | 0.25  | -0.15 | 0.37  |
| STK11     | hKQsi002 | E10 | 5 | 10 | -0.32 | 0.48  | 0.47  |
| TXK       | hKQsi002 | E11 | 5 | 11 | -0.55 | -0.69 | -0.46 |
| NME5      | hKQsi002 | E12 | 5 | 12 | -1.03 | 0.54  | 0.11  |
| DGKE      | hKQsi002 | E13 | 5 | 13 | 0.42  | 0.33  | 0.30  |
| RIPK1     | hKQsi002 | E14 | 5 | 14 | -0.64 | -0.36 | 0.20  |
| MAP3K14   | hKQsi002 | E15 | 5 | 15 | -0.99 | -0.61 | -0.55 |
| AURKB     | hKQsi002 | E17 | 5 | 17 | -1.03 | 0.71  | 0.99  |
| AKAP5     | hKQsi002 | E18 | 5 | 18 | 0.06  | -0.27 | -0.45 |
| AKT3      | hKQsi002 | E19 | 5 | 19 | 1.13  | 0.63  | 0.60  |
| MERTK     | hKQsi002 | E20 | 5 | 20 | -1.20 | -1.12 | -1.25 |
| TLK2      | hKQsi002 | E21 | 5 | 21 | 0.12  | -2.24 | -1.69 |
| STK38     | hKQsi002 | E22 | 5 | 22 | 1.72  | 0.51  | -0.09 |
| PRKACA    | hKQsi002 | F3  | 6 | 3  | 1.55  | 0.19  | -0.24 |
| PRKCG     | hKQsi002 | F4  | 6 | 4  | 0.00  | 0.13  | 0.13  |
| MAPK6     | hKQsi002 | F5  | 6 | 5  | 0.40  | 0.48  | 0.44  |

|          |          |     |   |    |       |       |       |
|----------|----------|-----|---|----|-------|-------|-------|
| PRKRIR   | hKQsi002 | F6  | 6 | 6  | -1.10 | 0.47  | 0.40  |
| ROCK1    | hKQsi002 | F7  | 6 | 7  | 0.52  | -1.17 | -0.96 |
| SRMS     | hKQsi002 | F8  | 6 | 8  | 0.67  | 0.83  | 0.55  |
| AURKC    | hKQsi002 | F10 | 6 | 10 | -0.06 | -0.83 | -0.85 |
| TYK2     | hKQsi002 | F11 | 6 | 11 | -0.27 | 0.42  | 0.25  |
| PIP5K1A  | hKQsi002 | F12 | 6 | 12 | 0.58  | -0.15 | -0.34 |
| DGKD     | hKQsi002 | F13 | 6 | 13 | 0.60  | 0.49  | 0.31  |
| RIPK2    | hKQsi002 | F14 | 6 | 14 | -0.38 | 1.24  | 0.83  |
| STK29    | hKQsi002 | F15 | 6 | 15 | -1.42 | -1.00 | -0.47 |
| RPS6KA5  | hKQsi002 | F17 | 6 | 17 | -0.63 | -1.21 | -1.12 |
| CDC42BPB | hKQsi002 | F18 | 6 | 18 | -0.63 | 0.24  | 0.32  |
| GENE     | hKQsi002 | F19 | 6 | 19 | -0.54 | 0.51  | 0.58  |
| STK25    | hKQsi002 | F20 | 6 | 20 | 0.50  | -1.14 | -0.88 |
| RIPK3    | hKQsi002 | F21 | 6 | 21 | 2.23  | -1.14 | -0.91 |
| PTK9L    | hKQsi002 | F22 | 6 | 22 | -0.96 | -0.68 | -0.54 |
| PRKACB   | hKQsi002 | G3  | 7 | 3  | -1.23 | -0.02 | 0.70  |
| PRKCH    | hKQsi002 | G4  | 7 | 4  | 1.21  | -0.28 | -0.66 |
| MAPK7    | hKQsi002 | G5  | 7 | 5  | 0.23  | 1.04  | 0.49  |
| PRKX     | hKQsi002 | G6  | 7 | 6  | 0.28  | -1.69 | -0.69 |
| ROS1     | hKQsi002 | G7  | 7 | 7  | -0.89 | 0.97  | 0.87  |
| SRPK1    | hKQsi002 | G8  | 7 | 8  | -1.47 | -0.12 | -0.15 |
| SYK      | hKQsi002 | G10 | 7 | 10 | -0.78 | -0.96 | -0.79 |
| TYRO3    | hKQsi002 | G11 | 7 | 11 | 0.37  | 0.36  | -0.01 |
| PIP5K1B  | hKQsi002 | G12 | 7 | 12 | 0.72  | -0.71 | -0.69 |
| CAMK1    | hKQsi002 | G13 | 7 | 13 | -0.60 | 0.66  | 0.85  |
| RIOK3    | hKQsi002 | G14 | 7 | 14 | -0.35 | 0.31  | -0.04 |
| MAP3K6   | hKQsi002 | G15 | 7 | 15 | 2.31  | -0.92 | -0.91 |
| MAPKAPK2 | hKQsi002 | G17 | 7 | 17 | -0.28 | -0.13 | -0.68 |
| AKAP12   | hKQsi002 | G18 | 7 | 18 | -0.37 | -0.78 | -0.43 |
| SGK2     | hKQsi002 | G19 | 7 | 19 | 0.59  | 1.77  | -0.37 |
| CIB2     | hKQsi002 | G20 | 7 | 20 | -1.64 | 0.03  | -0.14 |
| PIM2     | hKQsi002 | G21 | 7 | 21 | -0.28 | -0.66 | -0.94 |
| AAK1     | hKQsi002 | G22 | 7 | 22 | -0.45 | -0.14 | 0.04  |
| PRKACG   | hKQsi002 | H3  | 8 | 3  | -0.85 | -0.17 | -0.35 |
| PRKCI    | hKQsi002 | H4  | 8 | 4  | -0.43 | 3.19  | 1.72  |
| MAPK8    | hKQsi002 | H5  | 8 | 5  | -0.74 | -0.15 | 0.42  |
| PRKY     | hKQsi002 | H6  | 8 | 6  | -0.92 | 0.19  | 0.48  |
| RPS6KA1  | hKQsi002 | H7  | 8 | 7  | -0.02 | 2.77  | 1.70  |
| SRPK2    | hKQsi002 | H8  | 8 | 8  | -0.08 | -0.89 | -0.25 |
| MAP3K7   | hKQsi002 | H10 | 8 | 10 | 0.68  | 0.47  | -0.08 |

|          |          |     |    |    |       |       |       |
|----------|----------|-----|----|----|-------|-------|-------|
| TYROBP   | hKQsi002 | H11 | 8  | 11 | -0.22 | 0.90  | 0.39  |
| PIP5K2B  | hKQsi002 | H12 | 8  | 12 | -0.03 | -1.11 | -1.18 |
| MAPKAPK5 | hKQsi002 | H13 | 8  | 13 | -0.27 | 0.70  | 0.27  |
| DYRK4    | hKQsi002 | H14 | 8  | 14 | -1.46 | -0.05 | 0.25  |
| PKMYT1   | hKQsi002 | H15 | 8  | 15 | 0.62  | -0.21 | 0.38  |
| STK17B   | hKQsi002 | H17 | 8  | 17 | 0.51  | -0.65 | -0.61 |
| AATK     | hKQsi002 | H18 | 8  | 18 | -1.57 | -0.43 | 1.30  |
| HIPK3    | hKQsi002 | H19 | 8  | 19 | -0.42 | 0.69  | -0.36 |
| AKAP3    | hKQsi002 | H20 | 8  | 20 | 0.00  | -0.44 | -0.16 |
| CIT      | hKQsi002 | H21 | 8  | 21 | -0.38 | 0.68  | 0.72  |
| LMTK2    | hKQsi002 | H22 | 8  | 22 | 1.03  | -0.87 | -0.82 |
| PKIA     | hKQsi002 | I3  | 9  | 3  | 0.54  | 0.16  | -0.07 |
| PRKCL1   | hKQsi002 | I4  | 9  | 4  | -0.02 | 0.09  | -0.03 |
| MAPK11   | hKQsi002 | I5  | 9  | 5  | 2.04  | 1.10  | 0.77  |
| PRSS7    | hKQsi002 | I6  | 9  | 6  | 0.12  | 0.70  | 0.23  |
| RPS6KA2  | hKQsi002 | I7  | 9  | 7  | 0.51  | -0.39 | -0.21 |
| NEK4     | hKQsi002 | I8  | 9  | 8  | -0.66 | 0.55  | -0.25 |
| TEC      | hKQsi002 | I10 | 9  | 10 | 0.39  | 1.56  | 1.11  |
| UGP2     | hKQsi002 | I11 | 9  | 11 | -0.27 | 0.42  | 1.14  |
| ULK1     | hKQsi002 | I12 | 9  | 12 | 0.43  | -0.16 | -0.33 |
| CDK10    | hKQsi002 | I13 | 9  | 13 | 0.28  | -1.27 | -1.13 |
| CDKL1    | hKQsi002 | I14 | 9  | 14 | -0.21 | 0.71  | 0.02  |
| LATS1    | hKQsi002 | I15 | 9  | 15 | 1.19  | 0.02  | -0.17 |
| STK17A   | hKQsi002 | I17 | 9  | 17 | 0.35  | -1.54 | -1.29 |
| IKBKE    | hKQsi002 | I18 | 9  | 18 | 0.73  | -0.03 | -0.42 |
| AKAP9    | hKQsi002 | I19 | 9  | 19 | 0.58  | 0.25  | -0.65 |
| ERN2     | hKQsi002 | I20 | 9  | 20 | -0.86 | 0.65  | 1.06  |
| KALRN    | hKQsi002 | I21 | 9  | 21 | 0.38  | 0.57  | 3.23  |
| ICK      | hKQsi002 | I22 | 9  | 22 | -0.21 | 0.68  | 0.28  |
| PKIB     | hKQsi002 | J3  | 10 | 3  | 0.03  | -0.07 | -0.57 |
| PRKCL2   | hKQsi002 | J4  | 10 | 4  | -0.32 | -1.34 | -1.08 |
| MAPK9    | hKQsi002 | J5  | 10 | 5  | -0.87 | 0.51  | 1.80  |
| PSKH1    | hKQsi002 | J6  | 10 | 6  | 0.41  | -0.72 | -0.46 |
| RPS6KA3  | hKQsi002 | J7  | 10 | 7  | -0.15 | -0.22 | -0.46 |
| STK3     | hKQsi002 | J8  | 10 | 8  | -0.95 | -0.84 | -0.78 |
| TEK      | hKQsi002 | J10 | 10 | 10 | 0.36  | -0.44 | -0.19 |
| UMPK     | hKQsi002 | J11 | 10 | 11 | -0.46 | -0.79 | -0.74 |
| STK24    | hKQsi002 | J12 | 10 | 12 | 1.52  | -0.22 | 0.04  |
| PDXK     | hKQsi002 | J13 | 10 | 13 | -0.34 | -0.46 | -1.08 |
| KSR      | hKQsi002 | J14 | 10 | 14 | -0.21 | 0.95  | 1.24  |

|         |          |     |    |    |       |       |       |
|---------|----------|-----|----|----|-------|-------|-------|
| HGS     | hKQsi002 | J15 | 10 | 15 | -1.52 | 0.55  | -0.24 |
| TAO1    | hKQsi002 | J17 | 10 | 17 | 0.73  | 1.19  | 0.69  |
| ULK2    | hKQsi002 | J18 | 10 | 18 | -1.42 | 0.39  | 0.75  |
| TNK2    | hKQsi002 | J19 | 10 | 19 | -0.54 | -0.82 | -1.11 |
| PDLIM5  | hKQsi002 | J20 | 10 | 20 | 0.23  | -0.54 | -0.44 |
| PKIG    | hKQsi002 | J21 | 10 | 21 | -0.37 | -1.71 | -1.46 |
| SORCS3  | hKQsi002 | J22 | 10 | 22 | -0.52 | -0.41 | -0.41 |
| PRKAG1  | hKQsi002 | K3  | 11 | 3  | 1.76  | 1.91  | 1.13  |
| PRKCM   | hKQsi002 | K4  | 11 | 4  | 0.62  | -0.56 | -0.72 |
| MAPK10  | hKQsi002 | K5  | 11 | 5  | 0.69  | 1.85  | 1.22  |
| PTK2    | hKQsi002 | K6  | 11 | 6  | 0.03  | 0.94  | 0.58  |
| RPS6KB1 | hKQsi002 | K7  | 11 | 7  | 1.09  | -0.91 | -0.99 |
| STK4    | hKQsi002 | K8  | 11 | 8  | 0.33  | -0.41 | 0.41  |
| TESK1   | hKQsi002 | K10 | 11 | 10 | 0.06  | 0.80  | 1.50  |
| VRK1    | hKQsi002 | K11 | 11 | 11 | -1.01 | 0.40  | -0.11 |
| DYRK3   | hKQsi002 | K12 | 11 | 12 | 2.46  | -0.20 | -0.06 |
| MADD    | hKQsi002 | K13 | 11 | 13 | 0.33  | 0.36  | -0.01 |
| CDK5R1  | hKQsi002 | K14 | 11 | 14 | -0.77 | 0.34  | 0.42  |
| DYRK1B  | hKQsi002 | K15 | 11 | 15 | -0.06 | -0.90 | -0.39 |
| TAO1    | hKQsi002 | K17 | 11 | 17 | 0.39  | 0.66  | 1.09  |
| SLK     | hKQsi002 | K18 | 11 | 18 | -0.15 | -0.03 | -0.06 |
| NME6    | hKQsi002 | K19 | 11 | 19 | 0.75  | 0.41  | -0.63 |
| CAMKK2  | hKQsi002 | K20 | 11 | 20 | 0.07  | 0.34  | 0.57  |
| MAP4K5  | hKQsi002 | K21 | 11 | 21 | 0.36  | -1.05 | -0.96 |
| MAPKBP1 | hKQsi002 | K22 | 11 | 22 | 0.89  | -0.44 | -0.51 |
| PRKAR1A | hKQsi002 | L3  | 12 | 3  | -1.78 | -0.58 | -1.00 |
| PRKCQ   | hKQsi002 | L4  | 12 | 4  | 0.46  | 0.23  | -0.26 |
| MAPK13  | hKQsi002 | L5  | 12 | 5  | -0.46 | 0.44  | 0.79  |
| PTK6    | hKQsi002 | L6  | 12 | 6  | -0.57 | 0.48  | 0.28  |
| RPS6KB2 | hKQsi002 | L7  | 12 | 7  | 0.24  | -0.47 | -0.73 |
| TGFBR1  | hKQsi002 | L10 | 12 | 10 | 1.38  | 0.53  | 0.17  |
| VRK2    | hKQsi002 | L11 | 12 | 11 | -0.48 | 1.43  | 0.95  |
| DYRK2   | hKQsi002 | L12 | 12 | 12 | 0.35  | 0.27  | 0.48  |
| MKNK1   | hKQsi002 | L13 | 12 | 13 | -2.00 | -0.82 | -0.07 |
| AKAP4   | hKQsi002 | L14 | 12 | 14 | -0.76 | 0.63  | -0.09 |
| MAP4K4  | hKQsi002 | L17 | 12 | 17 | 0.66  | -0.25 | 1.74  |
| IHPK1   | hKQsi002 | L18 | 12 | 18 | 0.48  | 2.87  | 1.24  |
| CNKS1R1 | hKQsi002 | L19 | 12 | 19 | 0.32  | 0.05  | -0.13 |
| PMVK    | hKQsi002 | L20 | 12 | 20 | 0.44  | -1.10 | -0.57 |
| MAP4K1  | hKQsi002 | L21 | 12 | 21 | 0.57  | 2.69  | 2.05  |

|          |          |     |    |    |       |       |       |
|----------|----------|-----|----|----|-------|-------|-------|
| PRKAR1B  | hKQsi002 | M3  | 13 | 3  | 0.93  | 0.66  | 0.71  |
| PRKCZ    | hKQsi002 | M4  | 13 | 4  | 1.10  | 1.38  | 1.02  |
| MAP2K1   | hKQsi002 | M5  | 13 | 5  | -0.11 | 0.57  | 0.68  |
| PTK7     | hKQsi002 | M6  | 13 | 6  | -1.13 | 0.62  | 0.41  |
| RYK      | hKQsi002 | M7  | 13 | 7  | -0.30 | -1.74 | -1.00 |
| TGFBR2   | hKQsi002 | M10 | 13 | 10 | -0.13 | -1.11 | -0.77 |
| WEE1     | hKQsi002 | M11 | 13 | 11 | -2.47 | -0.25 | -0.12 |
| CDC42BPA | hKQsi002 | M12 | 13 | 12 | 0.35  | 2.13  | 1.28  |
| CASK     | hKQsi002 | M13 | 13 | 13 | 0.33  | 1.27  | 1.15  |
| STK19    | hKQsi002 | M14 | 13 | 14 | 0.34  | 0.17  | -0.15 |
| EIF2AK3  | hKQsi002 | M17 | 13 | 17 | 1.05  | 1.46  | 4.28  |
| GIT2     | hKQsi002 | M18 | 13 | 18 | -0.49 | -0.35 | 0.53  |
| AKAP8    | hKQsi002 | M19 | 13 | 19 | -0.74 | -0.67 | 0.66  |
| PLK4     | hKQsi002 | M20 | 13 | 20 | 0.30  | -0.16 | 0.09  |
| CHEK2    | hKQsi002 | M21 | 13 | 21 | 0.81  | -1.58 | -1.36 |
| PRKAR2A  | hKQsi002 | N3  | 14 | 3  | 1.35  | -0.07 | -0.68 |
| PRKDC    | hKQsi002 | N4  | 14 | 4  | 0.68  | 0.53  | -0.08 |
| MAP2K2   | hKQsi002 | N5  | 14 | 5  | -0.31 | 0.21  | 0.48  |
| PTK9     | hKQsi002 | N6  | 14 | 6  | -0.53 | 1.06  | 0.99  |
| MAPK12   | hKQsi002 | N7  | 14 | 7  | -0.76 | -0.38 | -0.20 |
| TIE      | hKQsi002 | N10 | 14 | 10 | -0.08 | -0.42 | -0.57 |
| YES1     | hKQsi002 | N11 | 14 | 11 | -0.93 | 0.45  | -0.05 |
| MAP4K3   | hKQsi002 | N12 | 14 | 12 | 1.24  | 1.66  | 0.73  |
| PRKRA    | hKQsi002 | N13 | 14 | 13 | 1.49  | -1.97 | -1.95 |
| SPHK1    | hKQsi002 | N14 | 14 | 14 | -0.29 | 0.06  | 0.16  |
| PRKCABP  | hKQsi002 | N17 | 14 | 17 | -1.14 | -0.27 | 0.01  |
| MELK     | hKQsi002 | N18 | 14 | 18 | -1.51 | -0.91 | -0.83 |
| SPEG     | hKQsi002 | N19 | 14 | 19 | -2.03 | 0.72  | 2.49  |
| MAP3K2   | hKQsi002 | N20 | 14 | 20 | -0.37 | -0.67 | 0.29  |
| IRAK3    | hKQsi002 | N21 | 14 | 21 | 0.98  | 0.13  | 0.48  |
| PRKAR2B  | hKQsi002 | O3  | 15 | 3  | -0.28 | -0.31 | -0.44 |
| PRKG1    | hKQsi002 | O4  | 15 | 4  | 0.61  | -1.15 | -0.91 |
| MAP2K3   | hKQsi002 | O5  | 15 | 5  | 1.32  | 2.95  | 2.49  |
| MAP4K2   | hKQsi002 | O6  | 15 | 6  | -1.81 | 1.25  | 1.14  |
| MAP2K4   | hKQsi002 | O7  | 15 | 7  | -1.10 | -0.70 | -0.40 |
| TK1      | hKQsi002 | O10 | 15 | 10 | -2.52 | 0.16  | -0.43 |
| ZAP70    | hKQsi002 | O11 | 15 | 11 | -0.29 | -0.49 | -0.37 |
| PIK3R3   | hKQsi002 | O12 | 15 | 12 | -0.72 | -0.29 | -0.44 |
| STK16    | hKQsi002 | O13 | 15 | 13 | -0.68 | -0.65 | -0.89 |
| PRPF4B   | hKQsi002 | O14 | 15 | 14 | 1.46  | 0.23  | 0.29  |

|          |          |     |    |    |       |       |       |
|----------|----------|-----|----|----|-------|-------|-------|
| AKAP7    | hKQsi002 | O17 | 15 | 17 | -0.16 | -1.47 | -1.14 |
| TLK1     | hKQsi002 | O18 | 15 | 18 | -0.60 | -1.62 | -0.78 |
| BCKDK    | hKQsi002 | O19 | 15 | 19 | 0.14  | -0.53 | -0.11 |
| PLK2     | hKQsi002 | O20 | 15 | 20 | 0.51  | -0.13 | -0.37 |
| AKAP13   | hKQsi002 | O21 | 15 | 21 | -0.36 | -1.75 | -1.54 |
| STK38L   | hKQsi003 | B3  | 2  | 3  | 0.91  | -0.19 | -0.53 |
| MAPK8IP2 | hKQsi003 | B4  | 2  | 4  | -0.04 | 0.95  | 1.17  |
| LATS2    | hKQsi003 | B5  | 2  | 5  | 0.35  | -1.58 | -0.79 |
| EEF2K    | hKQsi003 | B6  | 2  | 6  | 0.85  | 0.07  | -0.14 |
| JK       | hKQsi003 | B7  | 2  | 7  | -1.12 | 0.01  | 0.52  |
| SNRK     | hKQsi003 | B8  | 2  | 8  | 0.88  | -0.58 | -0.62 |
| RFK      | hKQsi003 | B10 | 2  | 10 | -0.16 | 0.01  | 0.82  |
| SPHK2    | hKQsi003 | B11 | 2  | 11 | 0.08  | 0.48  | 1.28  |
| FN3K     | hKQsi003 | B12 | 2  | 12 | -0.35 | 0.24  | -0.32 |
| FN3KRP   | hKQsi003 | B13 | 2  | 13 | -0.67 | -0.45 | 0.29  |
| UCK1     | hKQsi003 | B14 | 2  | 14 | -1.60 | 0.43  | 0.88  |
| PSKH2    | hKQsi003 | B15 | 2  | 15 | -0.93 | -0.04 | -0.90 |
| GRK7     | hKQsi003 | B17 | 2  | 17 | 0.87  | -0.70 | -1.79 |
| TTBK2    | hKQsi003 | B18 | 2  | 18 | 0.38  | 0.48  | -1.14 |
| NRK      | hKQsi003 | B19 | 2  | 19 | 0.92  | -0.99 | 0.18  |
| MAST4    | hKQsi003 | B20 | 2  | 20 | 0.46  | 0.68  | 0.99  |
| MAST3    | hKQsi003 | C3  | 3  | 3  | 3.86  | -0.63 | -0.22 |
| CCRK     | hKQsi003 | C4  | 3  | 4  | -1.45 | 0.52  | 0.30  |
| STK23    | hKQsi003 | C5  | 3  | 5  | -0.36 | -1.34 | 0.02  |
| NME7     | hKQsi003 | C6  | 3  | 6  | 0.54  | 0.87  | 1.29  |
| PRKAG2   | hKQsi003 | C7  | 3  | 7  | -0.64 | 0.57  | 0.25  |
| EPS8L1   | hKQsi003 | C8  | 3  | 8  | 0.29  | -1.22 | -0.18 |
| STK32B   | hKQsi003 | C10 | 3  | 10 | -0.84 | -0.07 | 0.38  |
| PAK6     | hKQsi003 | C11 | 3  | 11 | -0.02 | -0.21 | -0.23 |
| NJMU-R1  | hKQsi003 | C12 | 3  | 12 | 0.99  | 0.67  | -0.30 |
| LRRK1    | hKQsi003 | C13 | 3  | 13 | -0.65 | -0.49 | -0.10 |
| RPS6KL1  | hKQsi003 | C14 | 3  | 14 | 0.13  | 0.08  | -0.02 |
| NYD-SP25 | hKQsi003 | C15 | 3  | 15 | 0.37  | 1.27  | 0.16  |
| STK11IP  | hKQsi003 | C17 | 3  | 17 | 0.64  | -0.87 | -1.38 |
| HIPK4    | hKQsi003 | C18 | 3  | 18 | 1.36  | -0.71 | -1.97 |
| HIPK1    | hKQsi003 | C19 | 3  | 19 | -0.43 | -0.61 | 0.92  |
| SBK1     | hKQsi003 | C20 | 3  | 20 | 0.66  | 1.18  | 0.79  |
| TNIK     | hKQsi003 | D3  | 4  | 3  | -0.32 | -0.24 | -0.17 |
| DAPK2    | hKQsi003 | D4  | 4  | 4  | -0.60 | 0.81  | 0.98  |
| RPS6KC1  | hKQsi003 | D5  | 4  | 5  | 0.57  | 0.41  | 0.59  |

|              |          |     |   |    |       |       |       |
|--------------|----------|-----|---|----|-------|-------|-------|
| PKN3         | hKQsi003 | D6  | 4 | 6  | 0.26  | 0.31  | 0.31  |
| IHPK2        | hKQsi003 | D7  | 4 | 7  | -0.44 | 0.98  | 0.42  |
| PXK          | hKQsi003 | D8  | 4 | 8  | 0.15  | -1.02 | 0.03  |
| STYK1        | hKQsi003 | D10 | 4 | 10 | -0.53 | -0.44 | -0.22 |
| SPEC2        | hKQsi003 | D11 | 4 | 11 | -1.07 | -0.27 | 0.47  |
| NUCKS        | hKQsi003 | D12 | 4 | 12 | -1.27 | 0.39  | 0.60  |
| PIP5K2C      | hKQsi003 | D13 | 4 | 13 | -1.23 | -0.45 | -0.64 |
| RIOK1        | hKQsi003 | D14 | 4 | 14 | -1.33 | -0.62 | -0.63 |
| NYD-SP25     | hKQsi003 | D15 | 4 | 15 | 1.00  | -0.20 | -0.98 |
| HAK          | hKQsi003 | D17 | 4 | 17 | 0.94  | -1.59 | -2.17 |
| PDIK1L       | hKQsi003 | D18 | 4 | 18 | -1.08 | 0.39  | -0.61 |
| PRPS1L1      | hKQsi003 | D19 | 4 | 19 | -1.41 | -0.29 | -0.19 |
| discontinued | hKQsi003 | D20 | 4 | 20 | -0.67 | -0.17 | -0.31 |
| SMG1         | hKQsi003 | E3  | 5 | 3  | -0.23 | 0.79  | 0.34  |
| PRKCBP1      | hKQsi003 | E4  | 5 | 4  | -0.80 | 0.60  | 0.61  |
| AKAP8L       | hKQsi003 | E5  | 5 | 5  | 0.76  | 0.28  | -0.21 |
| NRBP         | hKQsi003 | E6  | 5 | 6  | 0.73  | 0.25  | -0.04 |
| NIPA         | hKQsi003 | E7  | 5 | 7  | -0.64 | 0.50  | 0.18  |
| URKL1        | hKQsi003 | E8  | 5 | 8  | 1.22  | -1.68 | -0.88 |
| PI4KII       | hKQsi003 | E10 | 5 | 10 | -1.01 | 0.38  | 0.57  |
| CAMK1D       | hKQsi003 | E11 | 5 | 11 | -0.45 | -1.88 | -0.64 |
| CERK         | hKQsi003 | E12 | 5 | 12 | 0.62  | -0.20 | -0.37 |
| NEK11        | hKQsi003 | E13 | 5 | 13 | 0.21  | -0.46 | -0.55 |
| MGC4796      | hKQsi003 | E14 | 5 | 14 | -2.56 | 0.02  | -0.41 |
| ADCK2        | hKQsi003 | E15 | 5 | 15 | 0.21  | 0.11  | -0.38 |
| IHPK3        | hKQsi003 | E17 | 5 | 17 | -1.59 | -0.73 | -0.84 |
| SNF1LK       | hKQsi003 | E18 | 5 | 18 | -0.42 | -0.27 | -1.33 |
| ERK8         | hKQsi003 | E19 | 5 | 19 | -0.45 | 0.11  | -0.16 |
| discontinued | hKQsi003 | E20 | 5 | 20 | -0.15 | 0.23  | -0.08 |
| ARHGAP26     | hKQsi003 | F3  | 6 | 3  | 1.77  | -0.53 | -0.18 |
| STK22B       | hKQsi003 | F4  | 6 | 4  | -0.63 | -0.34 | -0.48 |
| TPK1         | hKQsi003 | F5  | 6 | 5  | -0.50 | -0.62 | -0.05 |
| PACSIN1      | hKQsi003 | F6  | 6 | 6  | 1.07  | 0.00  | -0.04 |
| CINP         | hKQsi003 | F7  | 6 | 7  | -0.72 | -0.08 | -0.76 |
| ULK4         | hKQsi003 | F8  | 6 | 8  | -0.61 | -0.32 | -0.36 |
| ALS2CR2      | hKQsi003 | F10 | 6 | 10 | 0.35  | 0.63  | 0.21  |
| ADCK1        | hKQsi003 | F11 | 6 | 11 | -0.01 | 0.37  | 0.53  |
| PINK1        | hKQsi003 | F12 | 6 | 12 | 1.83  | -0.74 | -0.79 |
| ADCK4        | hKQsi003 | F13 | 6 | 13 | 0.18  | -0.94 | -0.17 |
| STK22D       | hKQsi003 | F14 | 6 | 14 | 0.40  | -0.16 | 0.18  |



|              |          |     |   |    |       |       |       |
|--------------|----------|-----|---|----|-------|-------|-------|
| NEK9         | hKQsi003 | F15 | 6 | 15 | -1.83 | -0.57 | -1.12 |
| CIB3         | hKQsi003 | F17 | 6 | 17 | -0.77 | -0.76 | -1.22 |
| WDSUB1       | hKQsi003 | F18 | 6 | 18 | -0.77 | -0.86 | -2.15 |
| ANKK1        | hKQsi003 | F19 | 6 | 19 | -0.55 | -0.91 | -1.19 |
| discontinued | hKQsi003 | F20 | 6 | 20 | 0.35  | 0.54  | 0.37  |
| CDK11        | hKQsi003 | G3  | 7 | 3  | 1.46  | -0.55 | 0.67  |
| SGKL         | hKQsi003 | G4  | 7 | 4  | -0.90 | 0.42  | 0.13  |
| HRI          | hKQsi003 | G5  | 7 | 5  | 1.24  | -0.02 | -0.41 |
| SH3KBP1      | hKQsi003 | G6  | 7 | 6  | 0.45  | 0.04  | 0.02  |
| NLK          | hKQsi003 | G7  | 7 | 7  | -0.83 | -0.10 | -0.36 |
| AKIP         | hKQsi003 | G8  | 7 | 8  | -0.47 | 0.44  | 0.99  |
| CAMKIINALPHA | hKQsi003 | G10 | 7 | 10 | -0.13 | 0.64  | -0.11 |
| PAK7         | hKQsi003 | G11 | 7 | 11 | 0.35  | -0.94 | 0.50  |
| ALS2CR7      | hKQsi003 | G12 | 7 | 12 | -0.03 | -0.21 | 0.08  |
| PANK2        | hKQsi003 | G13 | 7 | 13 | 0.33  | -1.10 | -0.97 |
| SSTK         | hKQsi003 | G14 | 7 | 14 | 0.43  | -1.71 | -0.31 |
| MLCK         | hKQsi003 | G15 | 7 | 15 | -1.16 | -0.87 | -1.12 |
| PIK3AP1      | hKQsi003 | G17 | 7 | 17 | 0.44  | -0.41 | -0.53 |
| CNKSR3       | hKQsi003 | G18 | 7 | 18 | -1.76 | 0.24  | -0.45 |
| MGC40579     | hKQsi003 | G19 | 7 | 19 | 0.04  | 0.54  | 0.48  |
| discontinued | hKQsi003 | G20 | 7 | 20 | 0.32  | 0.23  | 0.58  |
| MAP3K7IP2    | hKQsi003 | H3  | 8 | 3  | 0.16  | -1.33 | -0.25 |
| PRKCN        | hKQsi003 | H4  | 8 | 4  | -0.32 | -0.93 | -1.11 |
| EIF2AK4      | hKQsi003 | H5  | 8 | 5  | 0.45  | -0.44 | 0.62  |
| HUNK         | hKQsi003 | H6  | 8 | 6  | 0.30  | 0.24  | -0.02 |
| UMP-CMPK     | hKQsi003 | H7  | 8 | 7  | -0.33 | -0.33 | -0.62 |
| FLJ10761     | hKQsi003 | H8  | 8 | 8  | 0.10  | -0.37 | -0.63 |
| ETNK1        | hKQsi003 | H10 | 8 | 10 | -0.82 | 0.13  | -0.42 |
| CAMK1G       | hKQsi003 | H11 | 8 | 11 | -0.88 | 0.29  | 0.90  |
| PRKWNK1      | hKQsi003 | H12 | 8 | 12 | -1.05 | 0.15  | 0.51  |
| LAK          | hKQsi003 | H13 | 8 | 13 | 0.40  | 0.64  | -0.09 |
| CAMKK1       | hKQsi003 | H14 | 8 | 14 | -0.90 | -1.16 | -0.09 |
| LYK5         | hKQsi003 | H15 | 8 | 15 | -0.65 | -0.60 | -0.11 |
| LRRK2        | hKQsi003 | H17 | 8 | 17 | 0.49  | -1.45 | -1.35 |
| AKAP28       | hKQsi003 | H18 | 8 | 18 | -1.02 | -0.58 | -1.83 |
| MAGI-3       | hKQsi003 | H19 | 8 | 19 | 1.00  | 0.74  | -0.35 |
| LOC392265    | hKQsi003 | H20 | 8 | 20 | -1.37 | -1.63 | -0.74 |
| MAST2        | hKQsi003 | I3  | 9 | 3  | 0.97  | -0.67 | 0.40  |
| CARKL        | hKQsi003 | I4  | 9 | 4  | 0.02  | 0.66  | 0.88  |
| STK36        | hKQsi003 | I5  | 9 | 5  | -0.98 | -0.47 | -1.05 |

|              |          |     |    |    |       |       |       |
|--------------|----------|-----|----|----|-------|-------|-------|
| PIK3R4       | hKQsi003 | I6  | 9  | 6  | -1.89 | -1.37 | 0.30  |
| CRK7         | hKQsi003 | I7  | 9  | 7  | 1.17  | -0.14 | -0.15 |
| PANK4        | hKQsi003 | I8  | 9  | 8  | 0.07  | -0.78 | -0.72 |
| HSMDPKIN     | hKQsi003 | I10 | 9  | 10 | 0.99  | 0.05  | -0.75 |
| CLK4         | hKQsi003 | I11 | 9  | 11 | 0.60  | 0.07  | -0.16 |
| FLJ13052     | hKQsi003 | I12 | 9  | 12 | 1.73  | 0.28  | 1.07  |
| ITPKC        | hKQsi003 | I13 | 9  | 13 | -0.07 | 0.31  | -0.16 |
| KIAA1811     | hKQsi003 | I14 | 9  | 14 | -0.60 | -1.09 | 1.06  |
| PRKCDBP      | hKQsi003 | I15 | 9  | 15 | 1.87  | -0.29 | -0.67 |
| CSNK1A1L     | hKQsi003 | I17 | 9  | 17 | 0.12  | -1.63 | -1.79 |
| DGKH         | hKQsi003 | I18 | 9  | 18 | -1.48 | 0.24  | -1.35 |
| STK32C       | hKQsi003 | I19 | 9  | 19 | 0.50  | 1.96  | 0.38  |
| discontinued | hKQsi003 | I20 | 9  | 20 | -0.35 | -0.68 | -0.57 |
| MAPK8IP3     | hKQsi003 | J3  | 10 | 3  | 0.12  | 0.65  | 0.66  |
| DUSTYPK      | hKQsi003 | J4  | 10 | 4  | 1.06  | -0.03 | 0.63  |
| RPS6KA6      | hKQsi003 | J5  | 10 | 5  | -0.56 | 0.33  | 0.28  |
| MINK         | hKQsi003 | J6  | 10 | 6  | 1.30  | -0.81 | -0.16 |
| RP6-213H19.1 | hKQsi003 | J7  | 10 | 7  | -0.72 | -0.01 | -0.19 |
| FLJ10986     | hKQsi003 | J8  | 10 | 8  | 1.26  | -0.51 | -0.13 |
| NAGK         | hKQsi003 | J10 | 10 | 10 | 0.57  | 0.03  | -0.15 |
| KIDINS220    | hKQsi003 | J11 | 10 | 11 | 0.40  | -0.17 | -0.06 |
| WNK4         | hKQsi003 | J12 | 10 | 12 | -0.69 | 0.26  | 0.05  |
| SKIP         | hKQsi003 | J13 | 10 | 13 | -0.32 | -0.66 | -0.68 |
| KIAA1804     | hKQsi003 | J14 | 10 | 14 | 0.42  | 0.06  | -0.10 |
| TP53RK       | hKQsi003 | J15 | 10 | 15 | -0.11 | -0.02 | -0.55 |
| AK7          | hKQsi003 | J17 | 10 | 17 | -0.38 | -1.30 | -0.62 |
| CSNK1A1P     | hKQsi003 | J18 | 10 | 18 | -1.65 | -0.51 | -1.71 |
| LOC283155    | hKQsi003 | J19 | 10 | 19 | -0.15 | 0.20  | -0.71 |
| LOC407835    | hKQsi003 | J20 | 10 | 20 | -0.28 | -0.36 | -0.39 |
| PASK         | hKQsi003 | K3  | 11 | 3  | 0.47  | 0.38  | 0.19  |
| PRKD2        | hKQsi003 | K4  | 11 | 4  | -0.23 | 0.02  | -0.63 |
| STK39        | hKQsi003 | K5  | 11 | 5  | -0.79 | 1.18  | 0.71  |
| AK3L1        | hKQsi003 | K6  | 11 | 6  | 0.77  | -1.35 | -0.58 |
| ZAK          | hKQsi003 | K7  | 11 | 7  | -0.11 | 0.43  | 0.08  |
| PI4K2B       | hKQsi003 | K8  | 11 | 8  | -1.09 | -0.81 | -0.72 |
| BMP2K        | hKQsi003 | K10 | 11 | 10 | -0.52 | 0.73  | 0.40  |
| KIAA1361     | hKQsi003 | K11 | 11 | 11 | 0.19  | 0.01  | 0.12  |
| PRKWINK3     | hKQsi003 | K12 | 11 | 12 | -0.10 | 0.11  | -0.26 |
| GKAP1        | hKQsi003 | K13 | 11 | 13 | 0.51  | -0.28 | -0.83 |
| TTBK1        | hKQsi003 | K14 | 11 | 14 | 1.35  | 0.11  | 0.70  |

|              |          |     |    |    |       |       |       |
|--------------|----------|-----|----|----|-------|-------|-------|
| LMTK3        | hKQsi003 | K15 | 11 | 15 | -0.24 | -0.84 | -1.42 |
| UHMK1        | hKQsi003 | K17 | 11 | 17 | -0.23 | 0.09  | -0.66 |
| MGC45428     | hKQsi003 | K18 | 11 | 18 | -2.95 | 0.58  | 0.16  |
| KSR2         | hKQsi003 | K19 | 11 | 19 | 0.72  | 1.23  | -0.14 |
| MAST4        | hKQsi003 | L3  | 12 | 3  | -0.22 | 0.36  | 1.28  |
| DKFZP434C131 | hKQsi003 | L4  | 12 | 4  | -0.98 | -0.81 | -0.27 |
| GIT1         | hKQsi003 | L5  | 12 | 5  | -0.23 | 0.48  | 0.14  |
| TNNI3K       | hKQsi003 | L6  | 12 | 6  | 0.78  | 0.28  | -0.01 |
| PANK1        | hKQsi003 | L7  | 12 | 7  | -0.58 | 0.95  | 1.67  |
| RIOK2        | hKQsi003 | L10 | 12 | 10 | 1.13  | -0.15 | 0.15  |
| KIAA1446     | hKQsi003 | L11 | 12 | 11 | 0.70  | -0.33 | 0.20  |
| PRKWNK2      | hKQsi003 | L12 | 12 | 12 | 0.39  | -0.04 | 0.04  |
| TRAF3IP3     | hKQsi003 | L13 | 12 | 13 | -0.09 | -0.33 | -0.66 |
| FLJ14800     | hKQsi003 | L14 | 12 | 14 | 0.56  | -0.20 | 0.02  |
| IRAK1BP1     | hKQsi003 | L17 | 12 | 17 | -0.45 | -0.41 | -1.02 |
| FUK          | hKQsi003 | L18 | 12 | 18 | -3.06 | -0.96 | 5.27  |
| NEK8         | hKQsi003 | L19 | 12 | 19 | -1.46 | 0.85  | -0.11 |
| SIK2         | hKQsi003 | M3  | 13 | 3  | 0.03  | 0.56  | 0.92  |
| IBTK         | hKQsi003 | M4  | 13 | 4  | -1.78 | 1.39  | 0.82  |
| HIPK2        | hKQsi003 | M5  | 13 | 5  | -1.49 | 0.14  | 0.86  |
| IRAK4        | hKQsi003 | M6  | 13 | 6  | 0.92  | 0.58  | 1.09  |
| PRKAG3       | hKQsi003 | M7  | 13 | 7  | -1.48 | 0.48  | 0.49  |
| TOPK         | hKQsi003 | M10 | 13 | 10 | -0.79 | -0.07 | 0.43  |
| MARK4        | hKQsi003 | M11 | 13 | 11 | -0.20 | -0.72 | 0.20  |
| STK33        | hKQsi003 | M12 | 13 | 12 | -0.84 | -1.86 | -0.53 |
| STK22C       | hKQsi003 | M13 | 13 | 13 | -0.45 | 0.73  | 0.48  |
| MASTL        | hKQsi003 | M14 | 13 | 14 | -0.83 | 0.42  | 0.68  |
| PNCK         | hKQsi003 | M17 | 13 | 17 | 0.18  | -0.55 | -1.00 |
| PIP5K3       | hKQsi003 | M18 | 13 | 18 | -2.41 | -0.04 | 0.54  |
| discontinued | hKQsi003 | M19 | 13 | 19 | -0.79 | 2.22  | 2.32  |
| PIP5K1C      | hKQsi003 | N3  | 14 | 3  | -0.58 | 1.03  | 2.21  |
| AK5          | hKQsi003 | N4  | 14 | 4  | -1.00 | 0.42  | 0.32  |
| TBK1         | hKQsi003 | N5  | 14 | 5  | 0.69  | 0.37  | 0.36  |
| VRK3         | hKQsi003 | N6  | 14 | 6  | 0.19  | 0.67  | 0.55  |
| CSNK1G1      | hKQsi003 | N7  | 14 | 7  | -0.79 | 0.17  | -0.02 |
| LOC55971     | hKQsi003 | N10 | 14 | 10 | -0.25 | 0.76  | 0.92  |
| TSKS         | hKQsi003 | N11 | 14 | 11 | 0.34  | 0.78  | 0.91  |
| MAPKAP1      | hKQsi003 | N12 | 14 | 12 | 0.00  | -0.74 | -0.48 |
| SNARK        | hKQsi003 | N13 | 14 | 13 | -0.72 | -0.37 | -0.67 |
| PDXK         | hKQsi003 | N14 | 14 | 14 | 0.35  | 1.11  | -0.13 |

|           |          |     |    |    |       |       |       |
|-----------|----------|-----|----|----|-------|-------|-------|
| NEK7      | hKQsi003 | N17 | 14 | 17 | -0.85 | -0.32 | -1.13 |
| STK32A    | hKQsi003 | N18 | 14 | 18 | -0.10 | 0.21  | -0.10 |
| NEK5      | hKQsi003 | N19 | 14 | 19 | -0.03 | 0.47  | 0.42  |
| P101-PI3K | hKQsi003 | O3  | 15 | 3  | 0.62  | 1.57  | 0.98  |
| HSPB8     | hKQsi003 | O4  | 15 | 4  | 0.70  | -2.02 | -0.96 |
| PACSIN3   | hKQsi003 | O5  | 15 | 5  | 0.43  | 0.83  | 1.00  |
| CDKL3     | hKQsi003 | O6  | 15 | 6  | -0.98 | 0.16  | -0.14 |
| ANKRD3    | hKQsi003 | O7  | 15 | 7  | -0.04 | -0.08 | 0.35  |
| STK31     | hKQsi003 | O10 | 15 | 10 | -0.78 | 0.96  | 1.65  |
| RBKS      | hKQsi003 | O11 | 15 | 11 | 1.24  | 0.96  | 0.31  |
| PANK3     | hKQsi003 | O12 | 15 | 12 | -0.37 | -0.95 | -0.23 |
| SHARPIN   | hKQsi003 | O13 | 15 | 13 | 0.57  | -0.75 | -0.25 |
| MYLK2     | hKQsi003 | O14 | 15 | 14 | -0.43 | 0.83  | 2.07  |
| STK35     | hKQsi003 | O17 | 15 | 17 | 0.04  | 1.75  | -0.02 |
| ADCK5     | hKQsi003 | O18 | 15 | 18 | -2.50 | -1.23 | -0.15 |
| CDKL4     | hKQsi003 | O19 | 15 | 19 | -0.48 | 1.04  | 1.70  |
